# Supplementary material for: Knowledge, attitude and practice of community pharmacy personnel in tuberculosis patient detection: a multicentre cross-sectional study in a high-burden tuberculosis setting
Source: PubMed Central journal article supplement — BMJ Open. 2022 Jul 5;12(7):e060078. doi: 10.1136/bmjopen-2021-060078 (PMC9258488; doi:10.1136/bmjopen-2021-060078), 2022-07-05
Supplement: bmjopen-2021-060078.draft_revisions.pdf [file bmjopen-2021-060078.draft_revisions.pdf]

# BMJ Open

BMJ Open is committed to open peer review. As part of this commitment we make the peer review history of every article we publish publicly available.

When an article is published we post the peer reviewers' comments and the authors' responses online. We also post the versions of the paper that were used during peer review. These are the versions that the peer review comments apply to.

The versions of the paper that follow are the versions that were submitted during the peer review process. They are not the versions of record or the final published versions. They should not be cited or distributed as the published version of this manuscript.

BMJ Open is an open access journal and the full, final, typeset and author-corrected version of record of the manuscript is available on our site with no access controls, subscription charges or pay-per-view fees (<http://bmjopen.bmj.com>).

If you have any questions on BMJ Open's open peer review process please email [info.bmjopen@bmj.com](mailto:info.bmjopen@bmj.com)

# BMJ Open

## The Potential Role of Community Pharmacy in Tuberculosis Case Detection: A Multicentre Cross-Sectional Study in a High-Burden Tuberculosis Setting

|                               |                                                                                                                                                                                                                                                                                                                                                                                                                                                                                                                                                                                                                                                                                                                                                                                                                                      |
|-------------------------------|--------------------------------------------------------------------------------------------------------------------------------------------------------------------------------------------------------------------------------------------------------------------------------------------------------------------------------------------------------------------------------------------------------------------------------------------------------------------------------------------------------------------------------------------------------------------------------------------------------------------------------------------------------------------------------------------------------------------------------------------------------------------------------------------------------------------------------------|
| Journal:                      | <i>BMJ Open</i>                                                                                                                                                                                                                                                                                                                                                                                                                                                                                                                                                                                                                                                                                                                                                                                                                      |
| Manuscript ID                 | bmjopen-2021-060078                                                                                                                                                                                                                                                                                                                                                                                                                                                                                                                                                                                                                                                                                                                                                                                                                  |
| Article Type:                 | Original research                                                                                                                                                                                                                                                                                                                                                                                                                                                                                                                                                                                                                                                                                                                                                                                                                    |
| Date Submitted by the Author: | 11-Dec-2021                                                                                                                                                                                                                                                                                                                                                                                                                                                                                                                                                                                                                                                                                                                                                                                                                          |
| Complete List of Authors:     | Pradipta, Ivan; Universitas Padjadjaran, Departement of Pharmacology and Clinical Pharmacy, Faculty of Pharmacy; Universitas Padjadjaran, Center of Excellence in Higher Education for Pharmaceutical Care Innovation<br>Khairunnisa, Khairunnisa; Universitas Sumatera Utara<br>Bahar, Muh. Akbar; Universitas Hasanuddin, Departement of Pharmacy<br>Kausar, Mersa ; Universitas Padjadjaran, Pharmacology & Clinical Pharmacy, Faculty of Pharmacy<br>Fitriana, Efi; Universitas Padjadjaran, Department of General Psychology and experiment<br>Ruslami, Rovina; Universitas Padjadjaran, Department of Biomedical Sciences<br>Aarnoutse, Rob ; Radboud University Medical Center, Department of Pharmacy<br>Abdulah, Rizky; Universitas Padjadjaran, Departement of Pharmacology and Clinical Pharmacy; Universitas Padjadjaran |
| Keywords:                     | Tuberculosis < INFECTIOUS DISEASES, Public health < INFECTIOUS DISEASES, Infection control < INFECTIOUS DISEASES                                                                                                                                                                                                                                                                                                                                                                                                                                                                                                                                                                                                                                                                                                                     |
|                               |                                                                                                                                                                                                                                                                                                                                                                                                                                                                                                                                                                                                                                                                                                                                                                                                                                      |

SCHOLARONE™  
Manuscripts

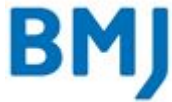

I, the Submitting Author has the right to grant and does grant on behalf of all authors of the Work (as defined in the below author licence), an exclusive licence and/or a non-exclusive licence for contributions from authors who are: i) UK Crown employees; ii) where BMJ has agreed a CC-BY licence shall apply, and/or iii) in accordance with the terms applicable for US Federal Government officers or employees acting as part of their official duties; on a worldwide, perpetual, irrevocable, royalty-free basis to BMJ Publishing Group Ltd ("BMJ") its licensees and where the relevant Journal is co-owned by BMJ to the co-owners of the Journal, to publish the Work in this journal and any other BMJ products and to exploit all rights, as set out in our [licence](#).

The Submitting Author accepts and understands that any supply made under these terms is made by BMJ to the Submitting Author unless you are acting as an employee on behalf of your employer or a postgraduate student of an affiliated institution which is paying any applicable article publishing charge ("APC") for Open Access articles. Where the Submitting Author wishes to make the Work available on an Open Access basis (and intends to pay the relevant APC), the terms of reuse of such Open Access shall be governed by a Creative Commons licence – details of these licences and which [Creative Commons](#) licence will apply to this Work are set out in our licence referred to above.

Other than as permitted in any relevant BMJ Author's Self Archiving Policies, I confirm this Work has not been accepted for publication elsewhere, is not being considered for publication elsewhere and does not duplicate material already published. I confirm all authors consent to publication of this Work and authorise the granting of this licence.

1  
2  
3 1 **The Potential Role of Community Pharmacy in Tuberculosis Case Detection:**  
4  
5 2 **A Multicentre Cross-Sectional Study in a High-Burden Tuberculosis Setting**  
6  
7 3

8  
9 4 Ivan S. Pradipta<sup>1,2\*</sup>, Khairunnisa<sup>3</sup>, Muh. Akbar Bahar<sup>4</sup>, Mersa N. Kausar<sup>5</sup>, Efi Fitriana<sup>6</sup>,  
10 5 Rovina Ruslami<sup>7</sup>, Rob E. Aarnoutse<sup>8</sup>, Rizky Abdulah<sup>1,2</sup>  
11  
12 6

13 7  
14  
15 8 <sup>1</sup>Departement of Pharmacology and Clinical Pharmacy, Faculty of Pharmacy, Universitas  
16 9 Padjadjaran, Bandung, Indonesia

17  
18 10 <sup>2</sup>Center of Excellence in Higher Education for Pharmaceutical Care Innovation, Universitas  
19 11 Padjadjaran, Bandung, Indonesia

20  
21 12 <sup>3</sup>Departement of Pharmacology and Clinical Pharmacy, Faculty of Pharmacy, Universitas  
22 13 Sumatera Utara, Medan, Indonesia

23  
24 14 <sup>4</sup>Departement of Pharmacy, Faculty of Pharmacy, Universitas Hasanudin, Makassar,  
25 15 Indonesia

26  
27 16 <sup>5</sup>Master of Clinical Pharmacy Program, Faculty of Pharmacy, Universitas Padjadjaran,  
28 17 Bandung, Indonesia

29  
30 18 <sup>6</sup>Department of General Psychology and experiment, Faculty of Psychology, Universitas  
31 19 Padjadjaran, Bandung, Indonesia

32  
33 20 <sup>7</sup> Department of Biomedical Sciences, Division of Pharmacology and Therapy, Faculty of  
34 21 Medicine, Universitas Padjadjaran, Bandung, Indonesia.

35  
36 22 <sup>8</sup> Department of Pharmacy, Radboud Institute for Health Sciences, Radboud University  
37 23 Medical Center, Nijmegen, The Netherlands.  
38  
39 24  
40  
41 25  
42 26  
43 27  
44 28  
45  
46  
47

48 29 \*Corresponding author:

49 30 Ivan S. Pradipta, Ph.D., PharmD

50 31 Department of Pharmacology and Clinical pharmacy

51 32 Universitas Padjadjaran

52 33 Jl. Raya Bandung- Sumedang Km.21

53 34 Sumedang- Jawa Barat. 45363

54 35 E-mail: [ivanpradipta@unpad.ac.id](mailto:ivanpradipta@unpad.ac.id)  
55  
56  
57  
58  
59  
60

**ABSTRACT**

**Introduction:** Control of tuberculosis (TB) is hampered by suboptimal case detection and subsequent delays in treatment, which is worsened by the COVID-19 pandemic. The community pharmacy is reported as the place for first aid medication among patients with TB. We, therefore, analysed knowledge, attitude, and practice (KAP) on TB case detection (TBCD) of the community pharmacy personnel, aiming to find innovative strategies to improve TBCD in the high-burden TB setting.

**Methods:** A multicentre cross-sectional study was performed in four areas representing Indonesia's eastern, central and western parts. Both pharmacists and pharmacy technicians who worked in the pharmacy were assessed their characteristics and KAP related to TBCD. Descriptive and regression analyses were used for the analyses.

**Results:** A total of 1,129 participants from 979 pharmacies, comprising pharmacists (56.6%) and pharmacy technicians (43.4%), were included in this study. Most participants knew about TB. However, knowledge related to TB symptoms, populations at risk, and medication are still suboptimal (<60%). Most participants showed a positive attitude on TBCD. They believed in their professional role (75.1%), capacity in TB screening (65.4%), and responsibility for TBCD (67.4%). Nevertheless, a lack of TBCD practice was identified in most participants, highlighting other factors affecting the practice. We analyzed factors associated with providing a TBCD practice, such as training experience (Beta coefficient (B)= 0.83;  $p<0.00$ ), provision of a drug consultation service (B= 0.68;  $p<0.00$ ), male gender (B= 0.41;  $p= 0.04$ ), positive attitude (B= 0.34;  $p<0.00$ ), working hours (B= -0.16;  $p<0.00$ ), and peripheral location of the pharmacy (B= -0.52;  $p= 0.03$ ).

**Conclusions:** The community pharmacy is a potential facility to support TBCD. However, exposure of TB training to the personnel and an integrated program with the national TB program is required. Further study is needed to comprehensively identify the local determinants and partnership strategies for engaging community pharmacies in TBCD.

**Keywords:** pharmacy, KAP, tuberculosis, Indonesia

1  
2  
3 64 **Strengths and limitations of this study**  
4

- 5 65
- 66 • This is the first study that explicitly analyzes the knowledge, attitude, and practice tuberculosis (TB) case detection among community pharmacies in Indonesia.
  - 67 • A total of 1,129 participants from 979 pharmacies is included in this study, obtained  
68 from Indonesia's western, central, and eastern parts.
  - 69 • Relevant stakeholders are involved in developing a research question and performing  
70 this study to improve the quality, safety, value, and sustainability of health systems and  
71 research.
  - 72 • This is a self-reported study that may raise the social desirability bias
  - 73 • The association between the factors and study outcome cannot be framed in the  
74 causality concept since the nature of the cross-sectional study does not consider the  
75 time difference between the causal factors and the effect
- 76  
77  
78  
79  
80  
81  
82  
83  
84  
85  
86  
87  
88  
89  
90  
91  
92

## 93 INTRODUCTION

94 Tuberculosis (TB), a disease caused by *Mycobacterium tuberculosis* (M.tb), remains an  
95 immense global health problem. The most recent TB report of the World Health Organization  
96 (WHO) estimated that its global incidence is about 9.9 million people, with total mortality  
97 around 1.3 million people in 2020[1]. The global treatment coverage is still low with great  
98 concern about multi-drug resistant tuberculosis (MDR-TB), i.e., the pathogen's resistance to  
99 at least two powerful anti-tuberculosis drugs (isoniazid and rifampicin). Global data showed  
100 that the success rate of MDR-TB treatment is only about 59%[1]. The TB problem gets more  
101 complex when it is considered that the COVID-19 pandemic affects TB case detection.

102 Globally, TB notification significantly decreased from 7.1 million (2019) to 5.8 million (2020)[1].  
103 The high-burden TB countries were reported as the largest contribution to the global shortfall  
104 in TB notification, such as India, Indonesia, Philippines, China, Bangladesh, and Pakistan.  
105 Indonesia is in the third rank of the high TB burden countries with around 824 thousand people  
106 contracted TB[1]. TB case notification in Indonesia significantly dropped from 566.8 thousand  
107 (2019) to 393.3 thousand (2020) due to the COVID-19 pandemic[1]. The WHO report  
108 highlights that potential undetected TB cases in the high-burden TB countries should be  
109 identified to control disease-spreading, drug resistance and improve treatment outcomes.

110 The community pharmacy is a potential facility that can help detect TB cases[2]. Studies in  
111 the high-burden TB countries showed that most TB patients initially present at the pharmacy  
112 for their first aid medication[3–8]. However, improper management of TB cases in pharmacies  
113 can lead to delayed diagnosis and inappropriate treatment[9,10]. A study in Indonesia  
114 estimated that the total delay is caused by various reasons, including visiting a pharmacy for  
115 the initial aid medication[3]. A qualitative study also showed that delayed TB diagnosis  
116 occurred when the TB patient received inappropriate treatment recommendations from a  
117 pharmacy[11]. Improper TB case management in the pharmacy might be due to poor TB  
118 knowledge, attitude, and practices from the pharmacy personnel. All this information suggests  
119 that improving TB care in the community pharmacy is needed to enhance the practice of TB  
120 screening and refer the suspected TB patient to the health care facility to support TB case  
121 detection.

122 However, there is still limited or no systematic and comprehensive guidance on the  
123 involvement of pharmacies for TB case detection, including in Indonesia. As a base for such  
124 guidance, a first study is needed to analyse the current situation and determinants for  
125 practising TB case detection among community pharmacies. Therefore, we conducted a  
126 multicentre cross-sectional study to analyse the characteristics, knowledge, attitude, and  
127 current practice of the pharmaceutical personnel in the community pharmacy regarding TB

1  
2  
3 128 case detection in Indonesia. To the best of our knowledge, this is the first study on this topic  
4 129 for the setting, and it will be beneficial to develop innovative strategies to increase TB case  
5 130 detection in the high-burden TB countries, including Indonesia.  
6  
7  
8  
9 131

## 10 132 **METHODS**

### 11 133 *Study design and setting*

12  
13 134 A cross-sectional study was performed in three major cities representing the western, central,  
14 135 and eastern parts of Indonesia, namely Medan, Bandung, and Makassar. To include the  
15 136 peripheral area of Indonesia, we also added an accessible peripheral area in the county of  
16 137 Bandung as a study site. Thus, four areas were defined as the study location. Makassar is the  
17 138 capital of South Sulawesi, located in the eastern part of Indonesia, with a 2,847,754  
18 139 population[12], while Medan is the capital of North Sumatera, located in the western part of  
19 140 Indonesia with a 2,681,830 population[12]. In the central part, the city of Bandung, West Java's  
20 141 capital, was selected as the study setting with a total population of 2,510,103[12]. In addition,  
21 142 the county of Bandung has a total population of 3,831,505[12], located around 50 kilometres  
22 143 from the city of Bandung.  
23  
24  
25  
26  
27  
28  
29  
30

31 144 In Indonesia, a pharmacy called *apotek*, is a community pharmacy managed by the private  
32 145 sector. It can be a chain pharmacy or an independent pharmacy. According to the national  
33 146 regulation, a pharmacy is a facility where a pharmacist performs pharmaceutical practices in  
34 147 the community[13]. Hence, a pharmacy must be under the authority of a pharmacist who holds  
35 148 a professional degree of pharmacy and pharmaceutical license from the Ministry of Health,  
36 149 Republic of Indonesia. One or more pharmacy technicians support a responsible pharmacist  
37 150 in a pharmacy. A pharmacy technician should hold a pharmaceutical practice license from the  
38 151 government and have the formal pharmaceutical education at least in the pharmaceutical  
39 152 vocational school, equivalent to senior high school education level[13].  
40  
41  
42  
43  
44  
45  
46

### 47 153 *Participants*

48  
49 154 We included participants who have an educational background as a pharmacist or a pharmacy  
50 155 technician; are working as pharmaceutical workers at the community pharmacy; and have  
51 156 experience in the pharmacy for at least six months. We excluded participants if they worked  
52 157 outside the pharmacy (e.g., in a community health centre, hospital) or were underqualified  
53 158 according to the national regulation.  
54  
55  
56

57 159 Data were obtained from July to October 2021 using so-called gatekeepers in each study site.  
58 160 The gatekeepers were representatives of the local professional pharmaceutical organisation  
59  
60



1  
2  
3 161 related to the research participants, and they were supported by researchers at each study  
4 162 site (ISP, Kh, MAB, MNK).

### 7 163 *Study size*

9 164 We used pharmacies as the unit sample in this study. An estimated 1,800 pharmacies in all  
10 165 the study sites were defined as the sample frame, considering the government and  
11 166 professional organisation data[14]. This study used an online Raosoft® sample size estimator  
12 167 to identify a minimum sample size [15]. In view of a 5% of margin error, 95% confidence level,  
13 168 and 50% response distribution, we identified a total of 317 pharmacies as the minimum sample  
14 169 size in this study. In light of the pandemic COVID-19 situation, we approached the pharmacies  
15 170 using online and offline research instruments. The geographical distribution of the pharmacies  
16 171 and its personnel were identified and followed up by the gatekeepers. According to the  
17 172 gatekeeper's data and networking, data collection was performed considering the pharmacy  
18 173 distribution at the sub-district level.

### 26 174 *Questionnaire development and validation*

28 175 A validated questionnaire was developed as the instrument for data collection. The  
29 176 questionnaire was developed based on the guideline for knowledge, attitude, and practice  
30 177 survey in TB published by WHO[16], the Indonesian national TB guideline[17], the expert's  
31 178 consensus on the physiological factors for implementing evidence-based practices[18], and  
32 179 previous relevant studies[19–21].

36 180 We defined four assessment domains, i.e., the participant's characteristics, knowledge,  
37 181 attitude, and practice in TB case detection. The domain for participant characteristics  
38 182 consisted of age, marital status, professional background, educational level, study site,  
39 183 working experience, an average of working hours per week, type of pharmacy (chain/  
40 184 independent pharmacy), number of pharmacies for the pharmaceutical practice, availability of  
41 185 physician practice in pharmacy, providing drug consultation services, and experience in TB  
42 186 training.

48 187  
49 188 We assessed TB knowledge related to activities in TB detection, i.e., TB pathogenesis,  
50 189 transmission, symptoms, risk population, diagnosis, and medication. Given the expert's  
51 190 consensus on the essential psychological determinants for implementing evidence based  
52 191 practice[18], the attitude domain was operationalised as the beliefs in the professional role,  
53 192 capability, and consequences of the activities for TB case detection. Finally, we defined  
54 193 practices of TB case detection as the activities in the screening of TB signs and symptoms,  
55 194 communicating with TB health care workers, and referring the suspected TB patient to the  
56 195 health facility for further examination in the sixth last months.

1  
2  
3 196  
4  
5 197 The participant's characteristics domain items were assessed using closed and short open  
6 198 questions, while the item of knowledge domain was measured on a nominal scale (true, false,  
7 199 and do not know). Five Likert scales were used for the attitude and practice domain items. We  
8 200 used "strongly agree", "agree", "doubt", "disagree", and "strongly disagree" for the attitude  
9 201 items, and "very often", "often", "sometimes", "rarely", and "never" for the frequency of practice  
10 202 items. To have a clear definition, we defined "very often" as the practice performed at least  
11 203 every week; "often" is the practice performed at least once a month; "sometimes" is the  
12 204 practice performed at least once 2-4 months; "rarely" is the practice performed once 5-6  
13 205 months; and "never" is never doing the practice in the last six months.

14 206 We assigned the questionnaire for face and content validation to experts with several  
15 207 backgrounds, i.e., an epidemiologist, a pharmacist, an assistant pharmacist, and a TB  
16 208 specialist. In light of the expert judgments, ISP (TB researcher) and EF (statistician and item  
17 209 developer) finalised the items. A pilot study involving 200 participants who were different from  
18 210 the participants was conducted for the validity and reliability test of the instrument.

#### 21 211 *Statistical analysis*

22 212 The pilot study tested the item validity by comparing the coefficient validity ( $r$ ) and its reference.  
23 213 Items were valid if the  $r$  calculation was higher than the  $r$  reference (0.13 for 200  
24 214 participants)[22]. The reliability test was conducted by identifying Cronbach's alpha that should  
25 215 be more than 0.60 for an acceptable reliability item[23,24].

26 216 Descriptive statistics were used to analyse the characteristics of participants. Categorical data  
27 217 were described as numbers and percentages. Median and interquartile range (IQR) were used  
28 218 for continuous and non-normally distributed data. As to the knowledge domain, percentages  
29 219 of participants who had correct answers per item were reported, while in the attitude and  
30 220 practice domain, percentages referred to participants who chose a particular scale in the  
31 221 items.

32 222 We performed regression analyses to identify factors associated with the practice of TB case  
33 223 detection. The normality of the residual was identified by assessing the shape of the residual  
34 224 histogram and probability-probability (P-P) plot. Multicollinearity was evaluated by identifying  
35 225 the variance inflation factor (VIF) less than 5[25]. For a comprehensive analysis, we analysed  
36 226 risk groups for poor TB knowledge and attitude as the dependent variables. Significance levels  
37 227 were set at 5% with a 95% confidence interval (CI). Data management and analysis were  
38 228 performed anonymously, and the analyses were conducted using SPSS version 26.

1  
2  
3 229 The strengthening of the reporting of observational studies in epidemiology (STROBE)  
4 230 guideline for a cross-sectional study was followed to have systematic and transparent study  
5 231 reporting[26].  
6  
7

### 8 232 *Patient and Public Involvement*

9  
10 233 The research question was developed considering the previous interviews and focus group  
11 234 discussions involving TB patients, a non-governmental organization, health service providers,  
12 235 and pharmacists. We involved the representation of professional organizations in pharmacy  
13 236 for data collection. The research will be disseminated in the relevant scientific forum involving  
14 237 pharmacists and technician pharmacists.  
15  
16  
17  
18

19 238

## 20 239 **RESULTS**

### 21 240 *Pilot study*

22  
23  
24 241 In the phase of questionnaire development, all experts agreed that all items could be used for  
25 242 the research instrument. All items fulfilled the face and content validity with minor structural  
26 243 and content revisions. A total of 40 items was developed to assess participant characteristics  
27 244 (16), knowledge (17), attitude (4), and practice (3). After being revised, we distributed the  
28 245 items to 200 participants for the validity and reliability test.  
29  
30  
31  
32  
33

34 246 The knowledge, attitude, and practice items were valid since the coefficient validities were  
35 247 identified from 0.15 to 0.88. Similarly, all the knowledge, attitude, and practice items were  
36 248 reliable items since Cronbach's alpha's were identified from 0.63 to 0.79. The participants'  
37 249 characteristics, validity, and reliability test in the pilot study can be seen in **Supplementary**  
38 250 **files 1, 2, and 3**, respectively.  
39  
40  
41  
42

### 43 251 *Main study*

44  
45 252 The validated questionnaire was distributed to all study sites in the main study. The  
46 253 participants were obtained from 979 pharmacies across the study sites, with 1,242 subjects.  
47 254 However, we excluded 113 subjects due to an under-qualified education level (4) and working  
48 255 outside of the community pharmacy (109). Finally, we included 1,129 participants for further  
49 256 data analysis. The flow diagram of the included participants is presented in **Figure 1**.  
50  
51  
52  
53

54 257 The professional background is a relative balance between pharmacists (56.6%) and  
55 258 pharmacy technicians (43.4%). We identified that the median age, working experience, and  
56 259 average working hours were 29 years old (IQR: 9), three years (IQR: 4), and 40 hours per  
57 260 week (IQR: 48). The majority of participants had an educational level at the professional  
58  
59  
60

261 degree of pharmacist (48.7%) followed by senior high school or equivalent (17.8%) and the  
 262 rest (33.5%). We assessed that a small proportion of the participants provided drug  
 263 consultation services in their pharmacies (13.4%). The proportion of participants who  
 264 conducted drug consultation services was only 13.4%. In terms of TB training, almost half of  
 265 the participants never had TB training (49.3%). The characteristics of the main study  
 266 participants can be seen in **Table 1**.

267 **Table 1.** Characteristics of the participants (n= 1,129)

| No                                       | The characteristics                                            | Number     |
|------------------------------------------|----------------------------------------------------------------|------------|
| <i>Socio-demographic characteristics</i> |                                                                |            |
| 1                                        | Female (number, %)                                             | 910 (80.6) |
| 2                                        | Age in year (median, IQR)                                      | 29 (9)     |
| 3                                        | Marital status (number, %)                                     |            |
|                                          | Single                                                         | 480 (42.5) |
|                                          | Married                                                        | 630 (55.8) |
|                                          | Widow/ widower                                                 | 19 (1.7)   |
| 4                                        | Educational level (number, %)                                  |            |
|                                          | Vocational pharmacy school or equivalent                       | 201 (17.8) |
|                                          | Diploma                                                        | 142 (12.6) |
|                                          | Bachelor                                                       | 147 (13.0) |
|                                          | Pharmacist                                                     | 550 (48.7) |
|                                          | Master                                                         | 81 (7.2)   |
|                                          | Doctor                                                         | 8 (0.7)    |
| 5                                        | The number of participant surveyed (number, %)                 |            |
|                                          | City of Bandung                                                | 240 (21.3) |
|                                          | County of Bandung                                              | 285 (25.2) |
|                                          | City of Makassar                                               | 280 (24.8) |
|                                          | City of Medan                                                  | 324 (28.7) |
| <i>Professional characteristics</i>      |                                                                |            |
| 4                                        | The professional background (number, %)                        |            |
|                                          | Pharmacy technicians                                           | 490 (43.4) |
|                                          | Pharmacists                                                    | 639 (56.6) |
| 7                                        | Working experiences in year (median, IQR)                      | 3 (4)      |
| 8                                        | The average of working time in hours per week (median, IQR)    | 40 ( 28)   |
| 9                                        | The number of practice places (number, %)                      |            |
|                                          | One pharmacy                                                   | 987 (87.4) |
|                                          | Two pharmacies                                                 | 86 (7.6)   |
|                                          | Three pharmacies                                               | 6 (0.5)    |
|                                          | More than three pharmacies                                     | 50 (4.4)   |
| 10                                       | Providing drug consultation services (number, %)               | 151 (13.4) |
| <i>Pharmacy characteristics</i>          |                                                                |            |
| 11                                       | Type of pharmacy (number, %)                                   |            |
|                                          | Chain pharmacy                                                 | 264 (23.4) |
|                                          | Independent pharmacy                                           | 865 (76.6) |
| 12                                       | The availability of physician practice in pharmacy (number, %) | 464 (41.1) |
| <i>TB related characteristics</i>        |                                                                |            |
| 13                                       | Experiencing in TB training (number, %)                        |            |
|                                          | Never                                                          | 557 (49.3) |

|  |                            |            |
|--|----------------------------|------------|
|  | More than two years ago    | 225 (19.9) |
|  | One-two years ago          | 191 (16.9) |
|  | Six months - one year ago  | 90 (8.0)   |
|  | Less than sixth months ago | 66 (5.8)   |

268 Information: IQR: interquartile

269

### 270 *TB knowledge*

271 We assessed that most of the TB knowledge items were correctly answered by the  
 272 participants. However, correct responses concerning TB signs and symptoms, risk population,  
 273 and TB medication were given by no more than 70% of the participants. The participants  
 274 inappropriately answered that losing body weight, chest pain, sweat at night, and fever for  
 275 more than a month are parts of TB symptoms (70.5%). The participants did not know that  
 276 diabetes mellitus is a risk factor for TB disease (45%). Moreover, although the participants  
 277 had a pharmaceutical background, they were not familiar with the TB regimen for drug-  
 278 sensitive TB and how to take the medication, either with or without food. The percentages of  
 279 participants who correctly answered on the first-line regimen for drug-sensitive TB in the  
 280 intensive treatment phase; the first-line regimen for drug-sensitive TB in the continuous  
 281 treatment phase; and the preferable utilisation of the first-line anti-TB drugs on an empty  
 282 stomach were only 62.4%, 54.5%, and 45.3%, respectively. The proportion of the correct  
 283 answers in the TB knowledge items is presented in **Table 2**.

284 **Table 2.** The items of TB knowledge (n= 1,129)

| No | Concept                | Items                                                                                                                 | Correct answer (%) |
|----|------------------------|-----------------------------------------------------------------------------------------------------------------------|--------------------|
| 1  | Pathogenesis           | Tuberculosis (TB) is caused by virus                                                                                  | 70.9               |
| 2  | TB transmission        | TB does not only spread into the lungs but also the other part of bodies, e.g., eyes, joints, and bone                | 82.1               |
|    |                        | TB can spread by droplet from coughing or sneezing of a pulmonary TB patient                                          | 97.7               |
|    |                        | The droplet containing TB pathogen can stay longer in the room with minimum ventilation                               | 88.5               |
| 3  | TB sign and symptom    | Coughing more than equal two weeks is a general sign of pulmonary TB                                                  | 82.4               |
|    |                        | An active TB patient can cough up blood                                                                               | 95.9               |
|    |                        | The general signs of pulmonary TB, i.e., loss of body weight, chest pain, sweat at night, and fever more than a month | 29.5               |
| 4  | Risk population        | Diabetes mellitus is a risk factor for having TB                                                                      | 55                 |
|    |                        | HIV is a risk factor for having TB                                                                                    | 84.4               |
|    |                        | Children under five years old is a risk group of TB disease                                                           | 75.6               |
| 5  | TB diagnosis procedure | A microscopic test of the TB patient's sputum is a diagnostic approach for TB                                         | 87.7               |

|   |                                           |                                                                                   |      |
|---|-------------------------------------------|-----------------------------------------------------------------------------------|------|
|   |                                           | A rapid molecular test of the TB patient's sputum is a diagnostic approach for TB | 76.3 |
| 6 | TB medication and its use                 | The first line of anti-tuberculosis regimen for the intensive phase               | 62.4 |
|   |                                           | The first line of anti-tuberculosis regimen for the continued phase               | 54.5 |
|   |                                           | Taking of anti-TB drugs without food                                              | 45.3 |
| 7 | Adverse drug reaction and drug monitoring | Adverse drug reaction of isoniazid                                                | 87.2 |
|   |                                           | Adverse drug reaction of rifampicin                                               | 78.2 |

285

286 *TB attitude*

287 Most participants believed they have a role (75.1%) and capability (65.4%) to detect TB cases  
 288 in their pharmacy. The majority of participants also felt guilty if they did not make any effort to  
 289 detect TB cases (67.4%). On the other hand, 58.2% of participants believed they had  
 290 significant barriers to finding TB cases in their workplace. It highlighted that most participants  
 291 realised they face significant barriers to performing TB case detection in their pharmacies. The  
 292 attitude of the participant is presented in **Table 3**.

293 **Table 3.** The items of attitude for TB case detection (n= 1,129)

| No | Concept               | Items                                                                                   | Percentage (%) |       |       |          |                   |
|----|-----------------------|-----------------------------------------------------------------------------------------|----------------|-------|-------|----------|-------------------|
|    |                       |                                                                                         | Strongly agree | Agree | Doubt | Disagree | Strongly disagree |
| 1  | The professional role | I have a role in finding TB cases in my workplace                                       | 21             | 54.1  | 15.1  | 9.2      | 0.6               |
| 2  | The capability        | I can screen TB signs and symptoms for the suspected TB patients who visit my workplace | 11.9           | 53.5  | 23.1  | 9.8      | 1.7               |
|    |                       | I feel that there are no significant barriers to finding new TB cases in my workplace   | 7              | 33.8  | 36.6  | 21.2     | 1.4               |
| 4  | The consequence       | I feel guilty if I do not make any efforts to find new TB cases in my workplace         | 21.2           | 46.2  | 19.1  | 20.6     | 1.8               |

294

295 *TB practice*

296 Our study demonstrated that most participants did not always perform the practice in TB case  
 297 detection. Only a small proportion of the participants routinely conducted TB screening (2%),

298 suggested the suspected TB patients for further examination (6.6%), and communicated with  
 299 TB health care providers about referring suspected TB patients (1.8%) every week in the last  
 300 six months. We assessed that more than 15% of the participants had never performed TB  
 301 case detection in their pharmacy in the last six months. The remaining participants stated that  
 302 practising TB case detection was performed once in 2-6 months. The practice of TB case  
 303 detection in the included participants is shown in **Table 4**.

304 **Table 4.** The items of the practice in TB case detection (n= 1,129)

| No | Items                                                                                                                             | Percentage (%) |       |            |        |       |
|----|-----------------------------------------------------------------------------------------------------------------------------------|----------------|-------|------------|--------|-------|
|    |                                                                                                                                   | Very often     | Often | Some times | Rarely | Never |
| 1  | Practice in screening TB signs and symptoms for people who suspected TB                                                           | 2              | 10.9  | 27.1       | 35.2   | 24.8  |
| 2  | Practice in suggesting the suspected TB patients for further health examination to the community health centre or health facility | 6.6            | 26.8  | 24.4       | 25.8   | 16.4  |
| 3  | Practice in communicating with TB health care providers in referring the suspected TB patient to them                             | 1.8            | 11.1  | 16.5       | 26.5   | 44.2  |

305 **Information:** Very often: at least every week; often: at least every month; sometimes: at least once 2-  
 306 4 months; rarely: at least once 5-6 months; never: never doing the activities in the last six months.

### 308 *Factors associated with TB practice and the exploratory analyses*

309 We included all participant characteristics, TB knowledge, and attitude items in a regression  
 310 analysis to identify factors associated with practice on TB case detection. Multicollinearity was  
 311 identified in the factors of education level and professional background. We, therefore,  
 312 removed the determinant of the level of education in the regression analysis. After it had been  
 313 removed, the regression assumption was fulfilled since the residual data were normally  
 314 distributed and no multicollinearity (**Supplementary File 4**)

315 The regression analysis showed that male gender (Beta coefficient, B= 0.41;  $p$ -value<0.05),  
 316 providing drug consultation services (B= 0.68;  $p$ <0.05), experience in TB training (B= 0.83;  
 317  $p$ <0.00), working hours per week (B= -0.16;  $p$ <0.05), being a participant from the county of  
 318 Bandung (B= -0.52;  $p$ <0.05), and a positive attitude on TB case detection (B= 0.34;  $p$ <0.00)  
 319 were significant factors for TB case detection practice. However, although the factor of working  
 320 hours and being a participant from the county of Bandung were significant factors for TB case  
 321 detection practice ( $p$ < 0.05), the beta coefficients were negative, which means that the factors  
 322 had negative effects on TB case detection activities. Among the significant factors, we  
 323 identified that factors related to experiencing TB training (B= 0.83), providing drug consultation

1  
2  
3 324 services (B= 0.68), male gender (B= 0.41), and a positive attitude on TB case detection (B=  
4 325 0.34) were the most influential factors in the practice of TB case detection. The regression  
5  
6 326 analysis of the factors associated with the practice of TB case detection is presented in  
7  
8 327 **Supplementary File 4.**

9  
10 328 Assuming TB knowledge and attitude were associated with TB case detection practice, we  
11 329 explored factors associated with TB knowledge and attitude. In terms of TB knowledge, we  
12 330 found that age (B= 0.07;  $p<0.05$ ), being a pharmacist (B= 2.2;  $p<0.00$ ), experience in TB  
13 331 training (B= 0.65;  $p<0.00$ ), and a positive attitude on TB case detection (B= 0.1;  $p<0.00$ ) were  
14 332 positively associated with TB knowledge. Meanwhile, a factor of being a participant from the  
15 333 county of Bandung (B= -1.04;  $p<0.00$ ) and city of Makassar (B= -1.13;  $p<0.00$ ) were negatively  
16 334 associated with TB knowledge as compared with being a participant from the city of Bandung.

17  
18 335 Regarding the attitude, the analysis demonstrated that factors positively associated with TB  
19 336 attitude were male gender (B= 0.68;  $p<0.00$ ), TB knowledge (B=0.74;  $p<0.00$ ), provision of  
20 337 drug consultation services (B= 0.91;  $p< 0.00$ ), experience in TB training (B= 0.84;  $p<0.00$ ),  
21 338 being a participant from the county of Bandung (B= 0.93;  $p< 0.00$ ) and city of Makassar (B=  
22 339 0.51;  $p<0.05$ ). Meanwhile, working in a chain pharmacy (B= -0.64;  $p<0.00$ ) was negatively  
23 340 associated with TB case detection attitude. The regression analyses on the factors associated  
24 341 with TB knowledge, and attitude, are presented in **Supplementary File 5.**

25 342 Generally, our study demonstrated that exposure of TB training is strongly associated with  
26 343 improving TB knowledge (B= 0.64;  $p< 0.00$ ), attitude (B= 0.84;  $p< 0.00$ ), and practice (B= 0.83;  
27 344  $p< 0.00$ ) in TB case detection.

28  
29  
30  
31  
32  
33  
34  
35  
36  
37  
38  
39 345

## 40 41 346 **DISCUSSION**

42  
43 347 Our study demonstrated that knowledge on TB as a disease was present among pharmacists  
44 348 and pharmacy technicians. However, a minority had incorrect responses on TB knowledge  
45 349 items. Despite their pharmaceutical background, many participants were unfamiliar with the  
46 350 first-line regimen for drug-susceptible TB. As to their attitude, most participants showed a role  
47 351 and capacity to detect TB cases in their pharmacy, but they realised significant barriers in  
48 352 performing TB case detection. In this respect, only a small proportion of participants already  
49 353 performed TB case detection practices in their community pharmacies.

50  
51 354 In terms of TB knowledge, our participants showed a high understanding of several topics,  
52 355 such as TB transmission, diagnostic procedures, and potential adverse drug reactions.  
53 356 However, the participants should be strengthened on the knowledge about TB signs and  
54 357 symptoms, risk population, and medication since those knowledge scores are relatively low.



1  
2  
3 358 These findings were also reported by a private retail survey in Tanzania that demonstrated  
4 359 the observed participants did not fully understand TB symptoms and the risk factor of TB[27].  
5  
6 360 Although some items are slightly different across the studies, studies on community pharmacy  
7  
8 361 in Peru[28], Tanzania[27], and Pakistan[29] showed that community pharmacy personnel  
9  
10 362 have the good basic knowledge for TB that support them conducting activities in TB case  
11 363 detection

12  
13 364

15 365 Practising TB case detection in the pharmacy was associated with experience in TB training,  
16 366 positive attitude, drug consultation services, male gender, short working hours per week, and  
17 367 pharmacies located in central city areas. We finally analysed that experience in following TB  
18 368 training is essential for improving TB knowledge, forming a positive attitude, and performing  
19 369 activities on TB case detection. Our study thus emphasises the importance of TB training to  
20 370 gain TB knowledge and a positive attitude. The knowledge and attitude can then generate  
21 371 action for TB case detection. It is in line with the knowledge, attitude, and practice (KAP) theory  
22 372 that states that the changes of human behaviours are divided into three successive processes,  
23 373 i.e., knowledge acquisition, the generation of attitudes, and the formation of behaviours [30].  
24 374 In the health belief model, knowledge plays a key role in generating action, then belief and  
25 375 attitude drive behaviour change[31].

26 376

29 377 Next to TB training and a positive attitude, we identified other factors relevant to the TB case  
30 378 detection practice, such as providing drug consultation services, male gender, and short  
31 379 working hours per week are associated with the TB case detection practice. This can be  
32 380 explained considering that the males and pharmacies who provide drug consultation services  
33 381 are identified with a positive attitude. Theoretically, the positive attitude will drive them to the  
34 382 TB case detection practice. Furthermore, we assessed that the long duration of working hours  
35 383 could be related to the high workload of the participants. The result is supported by a KAP  
36 384 study that showed that lack of time is the main problem in managing TB case management  
37 385 among pharmacies in Peru[28]. In line with our finding, a qualitative study in India explored  
38 386 that barriers of community pharmacy for TB case detection are the patient volume and  
39 387 workload[32].

40 388 In the geographical aspect, our study revealed that pharmacy personnel in a peripheral city  
41 389 area have fewer practices in TB case detection than the pharmacy personnel in the central  
42 390 city. However, the differences in knowledge and attitude between the areas cannot be  
43 391 analysed clearly. This finding underlines that unidentified factors other than knowledge and  
44 392 attitude may affect the practice of TB case detection in a particular area. A systematic review  
45 393 describes that several factors can affect health care practices, such as guidelines, individual

1  
2  
3 394 health care provider, patient, professional interaction, incentive and resources, capacity for  
4  
5 395 organizational change, social, political, and legal factors[33].  
6

7 396 This study, however, still has limitations. First, this is a self-reported study that may raise the  
8  
9 397 social desirability bias. In that potential bias, the participants may respond in a socially  
10  
11 398 acceptable way that contradicts the fact. Second, the association between the factors and  
12  
13 399 study outcome cannot be framed in the causality concept since the nature of the cross-  
14  
15 400 sectional study does not consider the time difference between the causal factors and effect.  
16  
17 401 However, several efforts were made to minimize the potential bias and increase this study's  
18  
19 402 validity and reliability. We stated in the questionnaire that the data would be analyzed and  
20  
21 403 presented anonymously. This can minimize social desirability bias since the participant's  
22  
23 404 identity would be unknown. We also used the gatekeepers with a broad network and a list of  
24  
25 405 pharmacies in the study sites for data collection. Hence, we reached a high number of  
26  
27 406 pharmacies and participants that can be generalized into the target population.

28  
29 407 Several future directions were drawn from this study. We analyzed that the community  
30  
31 408 pharmacy is a potential facility to increase TB case detection. It considers that most community  
32  
33 409 pharmacy personnel already has certain knowledge and a positive attitude in TB case  
34  
35 410 detection. Moreover, the evidence shows that they are indeed the main facility to seek first aid  
36  
37 411 medication for TB patients[3–8]. The other evidence from India, Pakistan, and Tanzania also  
38  
39 412 supported that community pharmacies can help TB case detection[34–36]. However, a  
40  
41 413 comprehensive strategy is required to follow up this study into the implementation level.  
42  
43 414

44  
45 415 First, further study is needed to comprehensively analyse the local determinants affecting TB  
46  
47 416 cases detection activities, including guideline, patient, professional interaction, incentive,  
48  
49 417 resource, capacity for organizational change, and social, political, and legal factors. A  
50  
51 418 qualitative study may be beneficial to explore in detail voices from the field related to the local  
52  
53 419 determinants and partnership strategies from the relevant stakeholders. The future  
54  
55 420 intervention can then be developed based on the identified local determinants and partnership  
56  
57 421 strategies. Second, TB training in improving the knowledge, attitude and practice should be  
58  
59 422 exposed to the community pharmacy. It is not only for increasing TB awareness about case  
60  
423 detection activities but also for minimizing irrational dispense of TB drugs[37] and raising  
424 awareness of the other potential role of community pharmacy in TB (e.g., treatment supporter,  
425 TB medication counsellor). Third, integrating the role of community pharmacy in TB case  
426 management with the National Tuberculosis Program (NTP) is essential to have the same  
427 vision and concept in accelerating TB elimination. Finally, technical guidance for performing  
428 TB case detection in pharmacy and how the activities can integrate with the NTP should also

1  
2  
3 429 be developed to have a successful community pharmacy engagement program, especially in  
4 430 improving TB case detection.

5 431  
6  
7

8 432 **CONCLUSION**  
9

10 433 Community pharmacies have potential roles in supporting TB case detection considering the  
11 434 current basic available knowledge and positive attitude. Our study explains that TB training is  
12 435 important to gain TB knowledge and a positive attitude in performing TB case detection. The  
13 436 knowledge and attitude can then be essential factors in generating action for TB case  
14 437 detection practices. Further study is needed to comprehensively identify the local  
15 438 determinants and partnership strategies with TB stakeholders for developing effective  
16 439 intervention and implementation of TB case detection in community pharmacies.  
17  
18  
19  
20  
21  
22  
23  
24  
25  
26  
27  
28  
29  
30  
31  
32  
33  
34  
35  
36  
37  
38  
39  
40  
41  
42  
43  
44  
45  
46  
47  
48  
49  
50  
51  
52  
53  
54  
55  
56  
57  
58  
59  
60

1  
2  
3 457 **REFERENCES**  
4

- 5 458 1 World Health Organization. Global tuberculosis report 2021. Geneva: 2021.  
6  
7 459 2 Miller R, Goodman C. Quality of tuberculosis care by pharmacies in low- and middle-  
8 460 income countries: Gaps and opportunities. *J Clin Tuberc Other Mycobact Dis*  
9 461 Published Online First: 2020. doi:10.1016/j.jctube.2019.100135  
10  
11 462 3 Lestari BW, McAllister S, Hadisoemarto PF, *et al.* Patient pathways and delays to  
12 463 diagnosis and treatment of tuberculosis in an urban setting in Indonesia. *Lancet Reg*  
13 464 *Heal – West Pacific* 2020;**5**:59. doi:10.1016/J.LANWPC.2020.100059  
14  
15 465 4 Surya A, Setyaningsih B, Suryani Nasution H, *et al.* Quality Tuberculosis Care in  
16 466 Indonesia: Using Patient Pathway Analysis to Optimize Public-Private Collaboration. *J*  
17 467 *Infect Dis* 2017;**216**:S724–32. doi:10.1093/infdis/jix379  
18  
19 468 5 Lönnroth K, Uplekar M, Blanc L. Hard gains through soft contracts: productive  
20 469 engagement of private providers in tuberculosis control. *Bull World Health Organ*  
21 470 2006;**84**:876–83. doi:10.2471/BLT.06.029983  
22  
23 471 6 Daftary A, Jha N, Pai M. Enhancing the role of pharmacists in the cascade of  
24 472 tuberculosis care. *J Epidemiol Glob Health* 2016;**7**:1–4.  
25 473 doi:10.1016/J.JEGH.2016.05.001  
26  
27 474 7 Kiwuwa MS, Charles K, Harriet MK. Patient and health service delay in pulmonary  
28 475 tuberculosis patients attending a referral hospital: a cross-sectional study. *BMC Public*  
29 476 *Health* 2005;**5**. doi:10.1186/1471-2458-5-122  
30  
31 477 8 Sreeramareddy CT, Qin ZZ, Satyanarayana S, *et al.* Delays in diagnosis and  
32 478 treatment of pulmonary tuberculosis in India: a systematic review. *Int J Tuberc Lung*  
33 479 *Dis* 2014;**18**:255–66. doi:10.5588/IJTLD.13.0585  
34  
35 480 9 Satyanarayana S, Kwan A, Daniels B, *et al.* Use of standardised patients to assess  
36 481 antibiotic dispensing for tuberculosis by pharmacies in urban India: a cross-sectional  
37 482 study. *Lancet Infect Dis* 2016;**16**:1261–8. doi:10.1016/S1473-3099(16)30215-8  
38  
39 483 10 Zawahir S, Le H, Nguyen TA, *et al.* Standardised patient study to assess tuberculosis  
40 484 case detection within the private pharmacy sector in Vietnam. *BMJ Glob Heal*  
41 485 2021;**6**:e006475. doi:10.1136/BMJGH-2021-006475  
42  
43 486 11 Pradipta IS, Idrus LR, Probandari A, *et al.* Barriers and strategies to successful  
44 487 tuberculosis treatment in a high-burden tuberculosis setting: a qualitative study from  
45 488 the patient’s perspective. *BMC Public Heal* 2021 211 2021;**21**:1–12.  
46 489 doi:10.1186/S12889-021-12005-Y  
47  
48 490 12 Badan Pusat Statistik. Badan Pusat Statistik. 2017;:335–58. doi:10.1055/s-2008-  
49 491 1040325  
49  
50 492 13 2011 KKR. Peraturan Menteri Kesehatan Republik Indonesia. *Peratur Menteri*  
51 493 *Kesehat No 2406 TAHUN 2011 tentang Pedoman Umum Pengguna Antibiot* 2011;:4.  
52  
53 494 14 Jumlah Apotek Berdasarkan Kabupaten/Kota di Jawa Barat.  
54 495 [https://opendata.jabarprov.go.id/id/dataset/jumlah-apotek-berdasarkan-](https://opendata.jabarprov.go.id/id/dataset/jumlah-apotek-berdasarkan-kabupatenkota-di-jawa-barat)  
55 496 [kabupatenkota-di-jawa-barat](https://opendata.jabarprov.go.id/id/dataset/jumlah-apotek-berdasarkan-kabupatenkota-di-jawa-barat) (accessed 2 Nov 2021).  
56  
57 497 15 Sample Size Calculator by Raosoft, Inc. <http://www.raosoft.com/samplesize.html>  
58 498 (accessed 26 Oct 2021).  
59  
60 499 16 WHO. *Advocacy, communication and social mobilization for TB control. A guide to*  
500 *developing knowledge, attitude and practice surveys*. 2008.

- 1  
2  
3 501 17 Kementerian Kesehatan Republik Indonesia. Peraturan menteri kesehatan Republik  
4 502 Indonesia no 67 tahun 2016 tentang penanggulangan tuberkulosis. 2010.
- 5  
6 503 18 Michie S, Johnston M, Abraham C, *et al.* Making psychological theory useful for  
7 504 implementing evidence based practice: A consensus approach. In: *Quality and Safety*  
8 505 *in Health Care*. 2005. doi:10.1136/qshc.2004.011155
- 9  
10 506 19 Farhanah AW, Sarimah A, Jafri Malin A, *et al.* Updates on knowledge, attitude and  
11 507 preventive practices on tuberculosis among healthcare workers. *Malaysian J. Med.*  
12 508 *Sci*. 2016. doi:10.21315/mjms2016.23.6.3
- 13  
14 509 20 Alotaibi B, Yassin Y, Mushi A, *et al.* Tuberculosis knowledge, attitude and practice  
15 510 among healthcare workers during the 2016 Hajj. *PLoS One* Published Online First:  
16 511 2019. doi:10.1371/journal.pone.0210913
- 17  
18 512 21 Mustafa T, Shahzad Y, Kiani A. A survey of knowledge, attitude, and practices of  
19 513 private retail pharmacies staff in tuberculosis care: Study from Dera Ismail Khan City,  
20 514 Pakistan. *J Pharm Policy Pract* Published Online First: 2018. doi:10.1186/s40545-  
21 515 018-0134-1
- 22  
23 516 22 Sugiyono S. *Metode penelitian kuantitatif dan kualitatif dan R&D*. Bandung: : Alfabeta  
24 517 2010.  
25 518 <https://scholar.google.com/scholar?cluster=15012642633429111321&hl=en&oi=scholar>  
26 519 (accessed 11 Nov 2021).
- 27  
28 520 23 Taber KS. The Use of Cronbach's Alpha When Developing and Reporting Research  
29 521 Instruments in Science Education. *Res Sci Educ* 2018;**48**:1273–96.  
30 522 doi:10.1007/S11165-016-9602-2/TABLES/1
- 31  
32 523 24 van Griethuijsen RALF, van Eijck MW, Haste H, *et al.* Global Patterns in Students'  
33 524 Views of Science and Interest in Science. *Res Sci Educ* 2014 454 2014;**45**:581–603.  
34 525 doi:10.1007/S11165-014-9438-6
- 35  
36 526 25 Vatcheva KP, Lee M, McCormick JB, *et al.* Multicollinearity in Regression Analyses  
37 527 Conducted in Epidemiologic Studies. *Epidemiol (Sunnyvale, Calif)* 2016;**6**.  
38 528 doi:10.4172/2161-1165.1000227
- 39  
40 529 26 E von E, DG A, M E, *et al.* The Strengthening the Reporting of Observational Studies  
41 530 in Epidemiology (STROBE) statement: guidelines for reporting observational studies.  
42 531 *Lancet (London, England)* 2007;**370**:1453–7. doi:10.1016/S0140-6736(07)61602-X
- 43  
44 532 27 Rutta E, Tarimo A, Delmotte E, *et al.* Understanding private retail drug outlet  
45 533 dispenser knowledge and practices in tuberculosis care in Tanzania. *Int J Tuberc*  
46 534 *Lung Dis* 2014;**18**:1108–13. doi:10.5588/ijtld.14.0020
- 47  
48 535 28 García PJ, Hernández-Córdova G, Pourjavaheri P, *et al.* Knowledge, attitudes and  
49 536 practices related to tuberculosis in pharmacy workers in a cross-sectional survey in El  
50 537 Agustino, Peru. *PLoS One* 2018;**13**. doi:10.1371/journal.pone.0196648
- 51  
52 538 29 Mustafa T, Shahzad Y, Kiani A. A survey of knowledge, attitude, and practices of  
53 539 private retail pharmacies staff in tuberculosis care: Study from Dera Ismail Khan City,  
54 540 Pakistan. *J Pharm Policy Pract* 2018;**11**. doi:10.1186/s40545-018-0134-1
- 55  
56 541 30 Fan Y, Zhang S, Li Y, *et al.* Development and psychometric testing of the Knowledge,  
57 542 Attitudes and Practices (KAP) questionnaire among student Tuberculosis (TB)  
58 543 Patients (STBP-KAPQ) in China. *BMC Infect Dis* 2018 181 2018;**18**:1–10.  
59 544 doi:10.1186/S12879-018-3122-9
- 60  
61 545 31 Rosenstock IM. Historical Origins of the Health Belief Model:  
62 546 <http://dx.doi.org/101177/109019817400200403> 1974;**2**:328–35.

- 1  
2  
3 547 doi:10.1177/109019817400200403  
4  
5 548 32 Gayathri P, Shah PB, Rajanandh MG. Barriers of community pharmacists in  
6 549 identification and referral of presumptive tuberculosis cases in Tiruvallur district of  
7 550 Tamil Nadu. *Indian J Tuberc* 2020;**67**:560–3. doi:10.1016/j.ijtb.2020.07.018  
8  
9 551 33 Flottorp SA, Oxman AD, Krause J, *et al.* A checklist for identifying determinants of  
10 552 practice: A systematic review and synthesis of frameworks and taxonomies of factors  
11 553 that prevent or enable improvements in healthcare professional practice. *Implement  
12 554 Sci* 2013 **8**:1–11. doi:10.1186/1748-5908-8-35  
13  
14 555 34 Daftary A, Satyanarayana S, Jha N, *et al.* Can community pharmacists improve  
15 556 tuberculosis case finding? A mixed methods intervention study in India. *BMJ Glob  
16 557 Heal* 2019;**4**:e001417. doi:10.1136/bmjgh-2019-001417  
17  
18 558 35 Ullah W, Almansour H, Fatima R, *et al.* Engaging Community Pharmacies in Early  
19 559 Detection of Missing Tuberculosis Patients through Public–Private Mix Intervention in  
20 560 Pakistan. *Am J Trop Med Hyg* 2020;**103**:221–30. doi:10.4269/AJTMH.19-0939  
21  
22 561 36 Colvin C, Mugyabuso J, Munuo G, *et al.* Evaluation of community-based interventions  
23 562 to improve TB case detection in a rural district of Tanzania. *Glob Heal Sci Pract*  
24 563 2014;**2**:219–25. doi:10.9745/GHSP-D-14-00026  
25  
26 564 37 Wulandari LPL, Khan M, Liverani M, *et al.* Prevalence and determinants of  
27 565 inappropriate antibiotic dispensing at private drug retail outlets in urban and rural  
28 566 areas of Indonesia: a mixed methods study. *BMJ Glob Heal* 2021;**6**:e004993.  
29 567 doi:10.1136/BMJGH-2021-004993  
30 568  
31  
32 569  
33  
34 570  
35  
36 571  
37  
38 572  
39  
40  
41 573  
42  
43 574  
44  
45 575  
46  
47 576  
48  
49  
50 577  
51  
52 578  
53  
54 579  
55  
56 580  
57  
58 581  
59  
60

1  
2  
3 582 **Acknowledgement**  
4

5 583 We wish to thank *Ikatan Apoteker Indonesia* (IAI) and *Perhimpunan Ahli Farmasi Indonesia*  
6 584 (PAFI) who supported this study. We acknowledge a collaborative PPKI funding program from  
7 585 the Indonesian World Class University Research Scheme 2021 for ISP (Universitas  
8 586 Padjadjaran) and Kh (Universitas Sumatera Utara). This funding source had no role in the  
9 587 concept development, study design, data analysis, or article preparation.  
10  
11  
12  
13

14 588 **Competing interests**  
15

16 589 The authors declare no competing interests.  
17

18 590 **Author contribution**  
19

20 591 Conception and design of the work: ISP, Kh, MAB, EF; Data acquisition: ISP, Kh, MAB, MNK;  
21 592 Data analysis and interpretation: ISP, EF, RA, REA, RR; Preparing the first draft: ISP;  
22 593 Substantial revised the manuscript: all authors; approval for the final manuscript: all authors  
23  
24  
25

26 594 **Ethics declarations**  
27

28 595 This study was approved by the ethics committee of Universitas Sumatera Utara No.  
29 596 599/KEP/USU/2021. All methods were carried out in accordance with the principle of the  
30 597 declaration of Helsinki.  
31  
32  
33

34 598 **Data availability statement**  
35

36 599 Data are available upon reasonable request. The data is managed at the Department of  
37 600 Pharmacology and Clinical Pharmacy, Universitas Padjadjaran under the supervision of Ivan  
38 601 S. Pradipta, PhD.  
39  
40  
41  
42  
43  
44  
45  
46  
47  
48  
49  
50  
51  
52  
53  
54  
55  
56  
57  
58  
59  
60

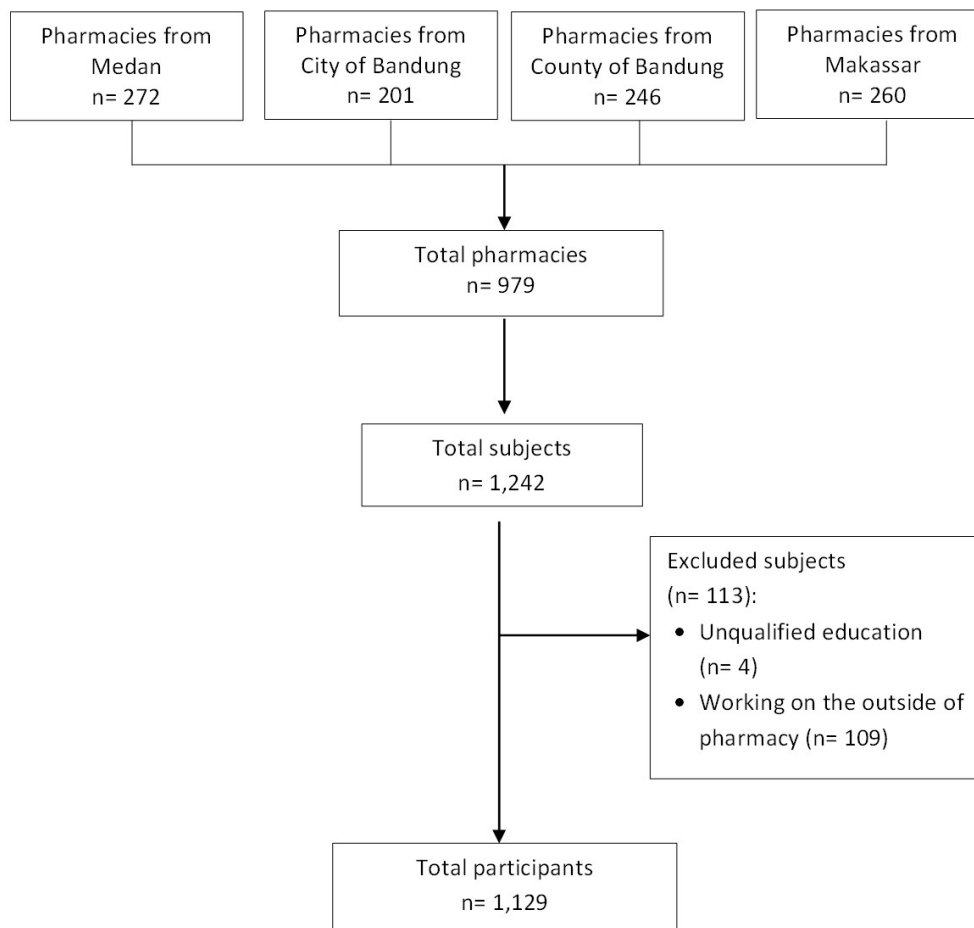

Figure 1. Flow diagram of the included participants

312x297mm (96 x 96 DPI)



1  
2  
3  
4  
5  
6  
7  
8  
9  
10  
11  
12  
13  
14  
15  
16  
17  
18  
19  
20  
21  
22  
23  
24  
25  
26  
27  
28  
29  
30  
31  
32  
33  
34  
35  
36  
37  
38  
39  
40  
41  
42  
43  
44  
45  
46  
47  
48  
49  
50  
51  
52  
53  
54  
55  
56  
57  
58  
59  
60

### SUPPLEMENTARY FILE

#### Supplementary File 1. Characteristics of the participants in the validity and reliability test (n= 200)

| No | The characteristics                              | Number     |
|----|--------------------------------------------------|------------|
| 1  | Female (number, %)                               | 175 (87.5) |
| 2  | Marital status (number, %)                       |            |
|    | Single                                           | 65 (32.5)  |
|    | Married                                          | 129 (64.5) |
|    | Widow/ widower                                   | 6 (3.0)    |
| 3  | Type of the professional background (number, %)  |            |
|    | Pharmacy technicians                             | 49 (24.5)  |
|    | Pharmacist                                       | 151 (75.5) |
| 4  | Educational level (number, %)                    |            |
|    | Senior high school or equivalent                 | 4 (2)      |
|    | Diploma                                          | 28 (14)    |
|    | Bachelor                                         | 15 (70.5)  |
|    | Pharmacist                                       | 141 (70.5) |
|    | Master                                           | 12 (6)     |
|    | Doctor                                           | 0          |
| 5  | Type of pharmacy (number, %)                     |            |
|    | Chain pharmacy                                   | 35 (17.5)  |
|    | Independent pharmacy                             | 165 (82.5) |
| 6  | The number of practice place (number, %)         |            |
|    | One pharmacy                                     | 173 (86.5) |
|    | Two pharmacies                                   | 20 (10)    |
|    | Three pharmacies                                 | 3 (1.5)    |
|    | More than three pharmacies                       | 4 (2)      |
| 7  | Providing drug consultation services (number, %) | 30 (15)    |
| 8  | Experiencing in TB training (number, %)          |            |
|    | Never                                            | 93 (46.5)  |
|    | More than two years ago                          | 47 (23.5)  |
|    | One- two years ago                               | 33 (16.5)  |
|    | Six months - one year ago                        | 23 (11.5)  |
|    | Less than sixth months ago                       | 4 (2)      |

**Supplementary File 2.** Validity test of the items (n= 200)

| Domain    | Items | Coefficient validity (r) |
|-----------|-------|--------------------------|
| Knowledge | K1    | 0.439                    |
|           | K2    | 0.422                    |
|           | K3    | 0.149                    |
|           | K4    | 0.172                    |
|           | K5    | 0.241                    |
|           | K6    | 0.166                    |
|           | K7    | 0.611                    |
|           | K8    | 0.385                    |
|           | K9    | 0.441                    |
|           | K10   | 0.259                    |
|           | K11   | 0.332                    |
|           | K12   | 0.298                    |
|           | K13   | 0.530                    |
|           | K14   | 0.585                    |
|           | K15   | 0.364                    |
|           | K16   | 0.512                    |
|           | K17   | 0.463                    |
| Attitude  | A1    | 0.715                    |
|           | A2    | 0.793                    |
|           | A3    | 0.661                    |
|           | A4    | 0.720                    |
| Practice  | P1    | 0.845                    |
|           | P2    | 0.884                    |
|           | P3    | 0.795                    |

**Information:** \*valid if the coefficient validity is more than 0.13 (coefficient validity reference for 200 participants)

**Supplementary File 3.** Reliability test of the items (n= 200)

| Domain    | Cronbach's Alpha |
|-----------|------------------|
| Knowledge | 0.63             |
| Attitude  | 0.69             |
| Practice  | 0.79             |

**Information:** \*Reliable if the Cronbach's alpha is more than 0.60

**Supplementary file 4.** Regression analysis of the factors associated with the practice of TB case detection among the included participants (n=1,125).

| Variable                                         | Beta Coefficient | Standard Error | p-value | 95% CI |       | VIF   |
|--------------------------------------------------|------------------|----------------|---------|--------|-------|-------|
|                                                  |                  |                |         | Min.   | Max.  |       |
| <b>Participant characteristics</b>               |                  |                |         |        |       |       |
| Male gender <sup>‡</sup>                         | .412             | .199           | .039    | .020   | .803  | 1.049 |
| Married status                                   | .252             | .190           | .186    | -.121  | .625  | 1.494 |
| Age                                              | -.019            | .015           | .205    | -.047  | .010  | 2.381 |
| <b>Professional characteristics</b>              |                  |                |         |        |       |       |
| Pharmacist <sup>§</sup>                          | -.173            | .199           | .385    | -.562  | .217  | 1.635 |
| Chain pharmacy <sup>¶</sup>                      | .286             | .206           | .166    | -.119  | .690  | 1.287 |
| Working experience                               | .020             | .018           | .256    | -.015  | .055  | 1.738 |
| Providing drug information services <sup>#</sup> | .682             | .232           | .003    | .226   | 1.138 | 1.056 |
| Availability of medical doctor practice          | .221             | .167           | .184    | -.105  | .548  | 1.134 |
| Experience in TB training                        | .831             | .160           | .000    | .516   | 1.145 | 1.085 |
| Working hours per week                           | -.016            | .005           | .001    | -.026  | -.006 | 1.224 |
| Two practice locations <sup>£</sup>              | .295             | .295           | .319    | -.285  | .874  | 1.037 |
| Three practice locations <sup>£</sup>            | .125             | .372           | .738    | -.606  | .855  | 1.104 |
| <b>Study sites</b>                               |                  |                |         |        |       |       |
| County of Bandung <sup>‡</sup>                   | -.521            | .240           | .031    | -.992  | -.049 | 1.842 |
| Makassar <sup>‡</sup>                            | .064             | .234           | .785    | -.395  | .522  | 1.720 |
| Medan <sup>‡</sup>                               | -.166            | .237           | .482    | -.631  | .298  | 1.936 |
| <b>The Knowledge and Attitude</b>                |                  |                |         |        |       |       |
| TB knowledge                                     | .022             | .024           | .363    | -.025  | .068  | 1.212 |
| TB Attitude                                      | .342             | .028           | .000    | .286   | .397  | 1.101 |

**Information:**  $R^2 = 0.20$ ;  $\beta$ -constant = 2.27; CI: confidence interval; VIF: variance inflation factor; Reference group = \*Female, ¥unmarried status, \$assitant pharmacist, †Single pharmacy, #No drug consultation service, £one practice location, ‡City of Bandung location

**Supplementary File 5.** Regression analysis for factors associated with knowledge and attitude of TB case detection (n=1,125).

| No | Variables                                         | Knowledge*         |         |        |       | Attitude**         |         |        |       |
|----|---------------------------------------------------|--------------------|---------|--------|-------|--------------------|---------|--------|-------|
|    |                                                   | Beta<br>coeficient | p-value | 95% CI |       | Beta<br>coeficient | p-value | 95% CI |       |
|    |                                                   |                    |         | Min.   | Max.  |                    |         | Min.   | Max.  |
| 1  | Male gender* <sup>\$</sup>                        | -.311              | 0.22    | -.805  | .182  | .677               | 0.00    | .263   | 1.091 |
| 2  | Age                                               | .067               | 0.00    | .031   | .103  | .011               | 0.47    | -.019  | .042  |
| 3  | Married status <sup>€</sup>                       | -.220              | 0.36    | -.691  | .251  | .181               | 0.37    | -.216  | .578  |
| 4  | Pharmacist                                        | 2.154              | 0.00    | 1.679  | 2.629 | .124               | 0.56    | -.290  | .538  |
| 5  | Chain pharmacy <sup>†</sup>                       | .476               | 0.06    | -.033  | .986  | -.639              | 0.00    | -1.067 | -.210 |
| 6  | Working experience                                | -.010              | 0.66    | -.054  | .034  | -.031              | 0.10    | -.069  | .006  |
| 7  | Working hour per week                             | -.001              | 0.84    | -.014  | .011  | -.006              | 0.26    | -.017  | .004  |
| 8  | Providing drug consultation services <sup>#</sup> | -.158              | 0.59    | -.734  | .417  | .913               | 0.00    | .432   | 1.395 |
| 9  | Experiencing in TB training                       | .646               | 0.00    | .251   | 1.041 | .836               | 0.00    | .505   | 1.167 |
| 10 | Two practice locations <sup>£</sup>               | -.599              | 0.19    | -1.330 | .132  | .160               | 0.61    | -.456  | .777  |
| 11 | Three or more practice locations <sup>£</sup>     | -.477              | 0.31    | -1.399 | .445  | -.097              | 0.81    | -.874  | .680  |
| 12 | County of Bandung' site <sup>‡</sup>              | -1.041             | 0.00    | -1.634 | -.449 | .934               | 0.00    | .436   | 1.433 |
| 13 | City of Makassar' site <sup>‡</sup>               | -1.128             | 0.00    | -1.703 | -.553 | .509               | 0.04    | .023   | .996  |
| 14 | City of Medan' site <sup>‡</sup>                  | -.473              | 0.11    | -1.059 | .112  | .211               | 0.40    | -.282  | .705  |
| 15 | TB knowledge                                      | n.a                | n.a     | n.a    | n.a   | .074               | 0.00    | .024   | .123  |
| 16 | Positive attitude in TB case detection            | .104               | 0.00    | .034   | .173  | n.a                | n.a     | n.a    | n.a   |
| 17 | Availability of medical doctor practice           | .305               | 0.15    | -.107  | .717  | .020               | 0.91    | -.327  | .368  |

**Information:** \* $R^2 = 0.18$ ; \*\* $R^2 = 0.09$ ; n.a: not applicable; The reference group = \*Female, ¥unmarried status, \$assitant pharmacist, †Single pharmacy, #No drug consultation service, £one practice location, ‡City of Bandung location.

STROBE Statement—Checklist of items that should be included in reports of *cross-sectional studies*

|                              | Item No | Recommendation                                                                                                                                                                                    | Page No      |
|------------------------------|---------|---------------------------------------------------------------------------------------------------------------------------------------------------------------------------------------------------|--------------|
| <b>Title and abstract</b>    | 1       | (a) Indicate the study's design with a commonly used term in the title or the abstract                                                                                                            | 1            |
|                              |         | (b) Provide in the abstract an informative and balanced summary of what was done and what was found                                                                                               | 2            |
| <b>Introduction</b>          |         |                                                                                                                                                                                                   |              |
| Background/rationale         | 2       | Explain the scientific background and rationale for the investigation being reported                                                                                                              | 4            |
| Objectives                   | 3       | State specific objectives, including any prespecified hypotheses                                                                                                                                  | 4            |
| <b>Methods</b>               |         |                                                                                                                                                                                                   |              |
| Study design                 | 4       | Present key elements of study design early in the paper                                                                                                                                           | 5            |
| Setting                      | 5       | Describe the setting, locations, and relevant dates, including periods of recruitment, exposure, follow-up, and data collection                                                                   | 5            |
| Participants                 | 6       | (a) Give the eligibility criteria, and the sources and methods of selection of participants                                                                                                       | 5            |
| Variables                    | 7       | Clearly define all outcomes, exposures, predictors, potential confounders, and effect modifiers. Give diagnostic criteria, if applicable                                                          | 6-7          |
| Data sources/<br>measurement | 8*      | For each variable of interest, give sources of data and details of methods of assessment (measurement). Describe comparability of assessment methods if there is more than one group              | 6-7          |
| Bias                         | 9       | Describe any efforts to address potential sources of bias                                                                                                                                         | 15           |
| Study size                   | 10      | Explain how the study size was arrived at                                                                                                                                                         | 6            |
| Quantitative variables       | 11      | Explain how quantitative variables were handled in the analyses. If applicable, describe which groupings were chosen and why                                                                      | 6-7          |
| Statistical methods          | 12      | (a) Describe all statistical methods, including those used to control for confounding                                                                                                             | 7            |
|                              |         | (b) Describe any methods used to examine subgroups and interactions                                                                                                                               | 7            |
|                              |         | (c) Explain how missing data were addressed                                                                                                                                                       | 7            |
|                              |         | (d) If applicable, describe analytical methods taking account of sampling strategy                                                                                                                | n.a          |
|                              |         | (e) Describe any sensitivity analyses                                                                                                                                                             | n.a          |
| <b>Results</b>               |         |                                                                                                                                                                                                   |              |
| Participants                 | 13*     | (a) Report numbers of individuals at each stage of study—eg numbers potentially eligible, examined for eligibility, confirmed eligible, included in the study, completing follow-up, and analysed | 8            |
|                              |         | (b) Give reasons for non-participation at each stage                                                                                                                                              | 8            |
|                              |         | (c) Consider use of a flow diagram                                                                                                                                                                | Fig.1        |
| Descriptive data             | 14*     | (a) Give characteristics of study participants (eg demographic, clinical, social) and information on exposures and potential confounders                                                          | 8 & table. 1 |
|                              |         | (b) Indicate number of participants with missing data for each variable of interest                                                                                                               | n.a          |
| Outcome data                 | 15*     | Report numbers of outcome events or summary measures                                                                                                                                              | Table 2-4    |

|    |                          |    |                                                                           |
|----|--------------------------|----|---------------------------------------------------------------------------|
| 1  |                          |    |                                                                           |
| 2  | Main results             | 16 | (a) Give unadjusted estimates and, if applicable, confounder-adjusted     |
| 3  |                          |    | estimates and their precision (eg, 95% confidence interval). Make clear   |
| 4  |                          |    | which confounders were adjusted for and why they were included            |
| 5  |                          |    |                                                                           |
| 6  |                          |    | (b) Report category boundaries when continuous variables were             |
| 7  |                          |    | categorized                                                               |
| 8  |                          |    |                                                                           |
| 9  |                          |    | (c) If relevant, consider translating estimates of relative risk into     |
| 10 |                          |    | absolute risk for a meaningful time period                                |
| 11 | Other analyses           | 17 | Report other analyses done—eg analyses of subgroups and                   |
| 12 |                          |    | interactions, and sensitivity analyses                                    |
| 13 |                          |    |                                                                           |
| 14 | <b>Discussion</b>        |    |                                                                           |
| 15 | Key results              | 18 | Summarise key results with reference to study objectives                  |
| 16 | Limitations              | 19 | Discuss limitations of the study, taking into account sources of          |
| 17 |                          |    | potential bias or imprecision. Discuss both direction and magnitude of    |
| 18 |                          |    | any potential bias                                                        |
| 19 |                          |    |                                                                           |
| 20 | Interpretation           | 20 | Give a cautious overall interpretation of results considering objectives, |
| 21 |                          |    | limitations, multiplicity of analyses, results from similar studies, and  |
| 22 |                          |    | other relevant evidence                                                   |
| 23 |                          |    |                                                                           |
| 24 | Generalisability         | 21 | Discuss the generalisability (external validity) of the study results     |
| 25 |                          |    |                                                                           |
| 26 | <b>Other information</b> |    |                                                                           |
| 27 | Funding                  | 22 | Give the source of funding and the role of the funders for the present    |
| 28 |                          |    | study and, if applicable, for the original study on which the present     |
| 29 |                          |    | article is based                                                          |
| 30 |                          |    |                                                                           |

31 \*Give information separately for exposed and unexposed groups.

32  
33  
34 **Note:** An Explanation and Elaboration article discusses each checklist item and gives methodological background and  
35 published examples of transparent reporting. The STROBE checklist is best used in conjunction with this article (freely  
36 available on the Web sites of PLoS Medicine at <http://www.plosmedicine.org/>, Annals of Internal Medicine at  
37 <http://www.annals.org/>, and Epidemiology at <http://www.epidem.com/>). Information on the STROBE Initiative is  
38 available at [www.strobe-statement.org](http://www.strobe-statement.org).  
39  
40  
41  
42  
43  
44  
45  
46  
47  
48  
49  
50  
51  
52  
53  
54  
55  
56  
57  
58  
59  
60

# BMJ Open

## Knowledge, Attitude, and Practice of Community Pharmacy Personnel in Tuberculosis Patient Detection: A Multicentre Cross-Sectional Study in a High-Burden Tuberculosis Setting

|                                 |                                                                                                                                                                                                                                                                                                                                                                                                                                                                                                                                                                                                                                                                                                                                                                                                                                      |
|---------------------------------|--------------------------------------------------------------------------------------------------------------------------------------------------------------------------------------------------------------------------------------------------------------------------------------------------------------------------------------------------------------------------------------------------------------------------------------------------------------------------------------------------------------------------------------------------------------------------------------------------------------------------------------------------------------------------------------------------------------------------------------------------------------------------------------------------------------------------------------|
| Journal:                        | <i>BMJ Open</i>                                                                                                                                                                                                                                                                                                                                                                                                                                                                                                                                                                                                                                                                                                                                                                                                                      |
| Manuscript ID                   | bmjopen-2021-060078.R1                                                                                                                                                                                                                                                                                                                                                                                                                                                                                                                                                                                                                                                                                                                                                                                                               |
| Article Type:                   | Original research                                                                                                                                                                                                                                                                                                                                                                                                                                                                                                                                                                                                                                                                                                                                                                                                                    |
| Date Submitted by the Author:   | 27-Apr-2022                                                                                                                                                                                                                                                                                                                                                                                                                                                                                                                                                                                                                                                                                                                                                                                                                          |
| Complete List of Authors:       | Pradipta, Ivan; Universitas Padjadjaran, Departement of Pharmacology and Clinical Pharmacy, Faculty of Pharmacy; Universitas Padjadjaran, Center of Excellence in Higher Education for Pharmaceutical Care Innovation<br>Khairunnisa, Khairunnisa; Universitas Sumatera Utara<br>Bahar, Muh. Akbar; Universitas Hasanuddin, Departement of Pharmacy<br>Kausar, Mersa ; Universitas Padjadjaran, Pharmacology & Clinical Pharmacy, Faculty of Pharmacy<br>Fitriana, Efi; Universitas Padjadjaran, Department of General Psychology and experiment<br>Ruslami, Rovina; Universitas Padjadjaran, Department of Biomedical Sciences<br>Aarnoutse, Rob ; Radboud University Medical Center, Department of Pharmacy<br>Abdulah, Rizky; Universitas Padjadjaran, Departement of Pharmacology and Clinical Pharmacy; Universitas Padjadjaran |
| <b>Primary Subject Heading</b>: | Health services research                                                                                                                                                                                                                                                                                                                                                                                                                                                                                                                                                                                                                                                                                                                                                                                                             |
| Secondary Subject Heading:      | Infectious diseases, Global health, Public health                                                                                                                                                                                                                                                                                                                                                                                                                                                                                                                                                                                                                                                                                                                                                                                    |
| Keywords:                       | Tuberculosis < INFECTIOUS DISEASES, Infection control < INFECTIOUS DISEASES, Public health < INFECTIOUS DISEASES                                                                                                                                                                                                                                                                                                                                                                                                                                                                                                                                                                                                                                                                                                                     |
|                                 |                                                                                                                                                                                                                                                                                                                                                                                                                                                                                                                                                                                                                                                                                                                                                                                                                                      |

SCHOLARONE™  
Manuscripts



I, the Submitting Author has the right to grant and does grant on behalf of all authors of the Work (as defined in the below author licence), an exclusive licence and/or a non-exclusive licence for contributions from authors who are: i) UK Crown employees; ii) where BMJ has agreed a CC-BY licence shall apply, and/or iii) in accordance with the terms applicable for US Federal Government officers or employees acting as part of their official duties; on a worldwide, perpetual, irrevocable, royalty-free basis to BMJ Publishing Group Ltd ("BMJ") its licensees and where the relevant Journal is co-owned by BMJ to the co-owners of the Journal, to publish the Work in this journal and any other BMJ products and to exploit all rights, as set out in our [licence](#).

The Submitting Author accepts and understands that any supply made under these terms is made by BMJ to the Submitting Author unless you are acting as an employee on behalf of your employer or a postgraduate student of an affiliated institution which is paying any applicable article publishing charge ("APC") for Open Access articles. Where the Submitting Author wishes to make the Work available on an Open Access basis (and intends to pay the relevant APC), the terms of reuse of such Open Access shall be governed by a Creative Commons licence – details of these licences and which [Creative Commons](#) licence will apply to this Work are set out in our licence referred to above.

Other than as permitted in any relevant BMJ Author's Self Archiving Policies, I confirm this Work has not been accepted for publication elsewhere, is not being considered for publication elsewhere and does not duplicate material already published. I confirm all authors consent to publication of this Work and authorise the granting of this licence.



1  
2  
3  
4  
5  
6  
7  
8  
9  
10  
11  
12  
13  
14  
15  
16  
17  
18  
19  
20  
21  
22  
23  
24  
25  
26  
27  
28  
29  
30  
31  
32  
33  
34  
35  
36  
37  
38  
39  
40  
41  
42  
43  
44  
45  
46  
47  
48  
49  
50  
51  
52  
53  
54  
55  
56  
57  
58  
59  
60

## 1 Knowledge, Attitude, and Practice of Community Pharmacy Personnel in 2 Tuberculosis Patient Detection: A Multicentre Cross-Sectional Study in a High- 3 Burden Tuberculosis Setting

4  
5 Ivan S. Pradipta<sup>1,2\*</sup>, Khairunnisa<sup>3</sup>, Muh. Akbar Bahar<sup>4</sup>, Mersa N. Kausar<sup>5</sup>, Efi Fitriana<sup>6</sup>,  
6 Rovina Ruslami<sup>7</sup>, Rob E. Aarnoutse<sup>8</sup>, Rizky Abdulah<sup>1,2</sup>

7  
8  
9  
10  
11  
12  
13  
14  
15  
16  
17  
18  
19  
20  
21  
22  
23  
24  
25  
26  
27  
28  
29  
30  
31  
32  
33  
34  
35  
36  
37  
38  
39  
40  
41  
42  
43  
44  
45  
46  
47  
48  
49  
50  
51  
52  
53  
54  
55  
56  
57  
58  
59  
60

1<sup>1</sup>Departement of Pharmacology and Clinical Pharmacy, Faculty of Pharmacy, Universitas  
2 Padjadjaran, Bandung, Indonesia

3<sup>2</sup>Drug Utilisation and Pharmacoepidemiology Research Group, Center of Excellence in  
4 Higher Education for Pharmaceutical Care Innovation, Universitas Padjadjaran, Bandung,  
5 Indonesia

6<sup>3</sup>Faculty of Pharmacy, Universitas Sumatera Utara, Medan, Indonesia

7<sup>4</sup>Departement of Pharmacy, Faculty of Pharmacy, Universitas Hasanuddin, Makassar,  
8 Indonesia

9<sup>5</sup>Master of Clinical Pharmacy Program, Faculty of Pharmacy, Universitas Padjadjaran,  
10 Bandung, Indonesia

11<sup>6</sup>Department of General Psychology and experiment, Faculty of Psychology, Universitas  
12 Padjadjaran, Bandung, Indonesia

13<sup>7</sup> Department of Biomedical Sciences, Division of Pharmacology and Therapy, Faculty of  
14 Medicine, Universitas Padjadjaran, Bandung, Indonesia.

15<sup>8</sup> Department of Pharmacy, Radboud Institute for Health Sciences, Radboud University  
16 Medical Center, Nijmegen, The Netherlands.

17  
18  
19  
20  
21  
22  
23  
24  
25  
26  
27  
28  
29  
30  
31  
32  
33  
34  
35  
36  
37  
38  
39  
40  
41  
42  
43  
44  
45  
46  
47  
48  
49  
50  
51  
52  
53  
54  
55  
56  
57  
58  
59  
60

\*Corresponding author:

Ivan S. Pradipta, Ph.D., PharmD

Department of Pharmacology and Clinical pharmacy

Universitas Padjadjaran

Jl. Raya Bandung- Sumedang Km.21

Sumedang- Jawa Barat. 45363

E-mail: [ivanpradipta@unpad.ac.id](mailto:ivanpradipta@unpad.ac.id)

**ABSTRACT**

**Introduction:** Control of tuberculosis (TB) is hampered by suboptimal case detection and subsequent delays in treatment, which is worsened by the COVID-19 pandemic. The community pharmacy is reported as the place for first aid medication among patients with TB. We, therefore, analysed knowledge, attitude, and practice (KAP) on TB patient detection (TBPD) of community pharmacy personnel, aiming to find innovative strategies to engage community pharmacies in TBPD.

**Methods:** A multicentre cross-sectional study was performed in four areas of Indonesia's eastern, central and western parts. Pharmacists and pharmacy technicians who worked in community pharmacies were assessed for their characteristics and KAP related to TBPD. Descriptive analysis was used to assess participant characteristics and their KAP, while multivariable regression analyses were used to analyse factors associated with the KAP on TBPD.

**Results:** A total of 1,129 participants from 979 pharmacies, comprising pharmacists (56.6%) and pharmacy technicians (43.4%), were included. Most participants knew about TB. However, knowledge related to TB symptoms, populations at risk, and medication for TB were still suboptimal. Most participants showed a positive attitude towards TBPD. They believed in their professional role (75.1%), capacity in TB screening (65.4%) and responsibility for TBPD (67.4%). Nevertheless, a lack of TBPD practice was identified in most participants. Several factors significantly associated with performing the TBPD practice ( $p < 0.05$ ), such as TB training experience ( $p < 0.001$ ), provision of a drug consultation service ( $p < 0.001$ ), male gender ( $p < 0.05$ ), a positive attitude towards TBPD ( $p < 0.001$ ), short working hours ( $p < 0.001$ ), and central city location of the pharmacy ( $p < 0.05$ ).

**Conclusions:** Most participants had good knowledge and attitude, which did not translate into actual TBPD practice. We identified that TB educational programs are essential in improving the KAP. A comprehensive assessment is needed to develop effective strategies to engage the community pharmacy in TBPD activities.

**Keywords:** pharmacy, KAP, Tuberculosis, Indonesia

## 65 **Strengths and limitations of this study**

- 66 • This is the first study that explicitly analyses tuberculosis patient detection knowledge,  
67 attitude and practice among pharmacists and pharmacy technicians in community  
68 pharmacies in Indonesia.
- 69 • A large number of 1,129 participants from 979 pharmacies were included in this study,  
70 obtained from Indonesia's western, central, and eastern parts.
- 71 • Relevant stakeholders were involved in developing the research question, the study's  
72 methodology, and its execution, which helped to assure the quality of the project and  
73 provided support for follow-up studies and interventions.
- 74 • This was a self-reported study that may have been biased by socially desirable  
75 responses.
- 76 • No causal relations can be inferred between factors related to patient characteristics,  
77 knowledge and attitude on the one hand and TB patient detection practice on the other  
78 hand since the nature of the cross-sectional study does not consider the time  
79 difference between the causal factors and the effect

## 95 INTRODUCTION

96 Tuberculosis (TB), a disease caused by *Mycobacterium tuberculosis* (M.tb), remains an  
97 immense global health problem. The most recent TB report of the World Health Organization  
98 (WHO) estimated that its global incidence is about 9.9 million people, with total mortality  
99 around 1.3 million people in 2020[1]. The global treatment coverage is still low, with great  
100 concern about multi-drug resistant tuberculosis (MDR-TB), i.e., the pathogen's resistance to  
101 at least two powerful anti-tuberculosis drugs (isoniazid and rifampicin). Global data showed  
102 that the success rate of MDR-TB treatment is only about 59%[1].

103 The TB problem gets more complex when it is considered that the COVID-19 pandemic affects  
104 TB patient detection (TBPD). Globally, TB notifications significantly decreased from 7.1 million  
105 (2019) to 5.8 million (2020)[1]. The high-burden TB countries, such as India, Indonesia,  
106 Philippines, China, Bangladesh, and Pakistan, contributed most to the global shortfall in TB  
107 notification. Indonesia is ranked third amongst the high TB burden countries, with around 824  
108 thousand people who contracted TB in 2020[1]. TB patient notification in Indonesia  
109 significantly dropped from 566.8 thousand (2019) to 393.3 thousand (2020) due to the COVID-  
110 19 pandemic[1].

111 The community pharmacy is a potential facility that can help detect TB patients[2]. Studies in  
112 high-burden TB countries showed that most TB patients initially present at the pharmacy for  
113 their first aid medication[3–8]. However, improper management of TB patients in pharmacies  
114 can lead to delayed diagnosis and inappropriate treatment[9,10]. A study in Indonesia  
115 estimated that the total delay is caused by various reasons, including visiting a pharmacy for  
116 the initial aid medication[3]. A qualitative study also showed that delayed TB diagnosis  
117 occurred when the TB patient received inappropriate treatment recommendations from a  
118 pharmacy[11]. Improper TB patient management in the pharmacy might be due to poor TB  
119 knowledge, attitude, and practices of the pharmacy personnel. All this information suggests  
120 that improving TB care in the community pharmacy is needed to enhance the practice of TB  
121 screening and refer a presumptive TB patient to the health care facility to support TBPD.

122 However, there is still limited or no systematic and comprehensive guidance on the  
123 involvement of pharmacies in TBPD, including in Indonesia. As a base for such guidance, a  
124 first study is needed to analyse the current situation and determinants for practising TBPD  
125 among community pharmacies. Therefore, we conducted a multicentre cross-sectional study  
126 to analyse the characteristics, knowledge, attitude, and practice (KAP) of the pharmaceutical  
127 personnel in the community pharmacy regarding TBPD in Indonesia. To the best of our  
128 knowledge, this is the first study on this topic for the setting, and it will be beneficial to develop  
129 innovative strategies to increase TBPD in Indonesia and other high-burden TB countries.

## 130 **METHODS**

### 131 *Study design and setting*

132 A cross-sectional study was performed in four areas in Indonesia's western, central, and  
133 eastern parts. The three areas are the capital of provinces, while one area is a peripheral area  
134 outside the province capital. Thus, four areas were defined as the study location, i.e.,  
135 Makassar, Medan, the city of Bandung, and the county of Bandung. Makassar is the capital of  
136 South Sulawesi, located in the eastern part of Indonesia, with a population of 2,847,754  
137 persons[12], while Medan is the capital of North Sumatera, located in the western part of  
138 Indonesia with 2,681,830 inhabitants[12]. In the central part, the city of Bandung, West Java's  
139 capital, was selected as the study setting with a total population of 2,510,103 persons[12]. In  
140 addition, the county of Bandung, with a total population of 3,831,505[12], located around 50  
141 kilometres from the city of Bandung, was included as a representation of the peripheral area  
142 in this study.

143 In Indonesia, a pharmacy called *apotek* is a community pharmacy managed by the private  
144 sector. It can be a chain pharmacy or an independent pharmacy. According to the national  
145 regulation, a pharmacy is a facility where a pharmacist performs pharmaceutical practices in  
146 the community[13]. Hence, a pharmacy must be under the authority of a pharmacist who holds  
147 a professional degree in pharmacy and a pharmaceutical license from the Ministry of Health,  
148 Republic of Indonesia. One or more pharmacy technicians support a responsible pharmacist  
149 in a pharmacy. A pharmacy technician should hold a pharmaceutical practice license from the  
150 government and have a formal pharmaceutical education, at least in the pharmaceutical  
151 vocational school, equivalent to a senior high school education level[13].

### 152 *Questionnaire development and validation*

153 A validated questionnaire was developed as the instrument for data collection. The  
154 questionnaire was developed based on the guideline for knowledge, attitude, and practice  
155 survey in TB published by the WHO[14], the practice of survey research[15], the Indonesian  
156 national TB guideline[16], experts' consensus on the psychological factors for implementing  
157 evidence-based practices[17], and previous relevant studies[18–20].

158 We defined four assessment domains, i.e., the participant's characteristics, knowledge,  
159 attitude, and practice in TBPD. The domain for participant characteristics consisted of age,  
160 marital status, professional background, educational level, study site, working experience, an  
161 average of working hours per week, type of pharmacy (chain/ independent pharmacy), number  
162 of pharmacies for the pharmaceutical practice, availability of a physician practice in the  
163 pharmacy, providing drug consultation services, and experience in TB training.

1  
2  
3 164 We assessed TB knowledge related to activities in TB detection, i.e., TB pathogen,  
4 165 transmission, symptoms, risk population, diagnosis, and medication. Given the experts'  
5 166 consensus on the essential psychological determinants for implementing evidence based  
6 167 practice[17], the attitude domain was operationalised as the beliefs in the professional role,  
7 168 capability, and consequences of the activities for TBPD. Finally, we defined practices of TBPD  
8 169 as the activities in the screening of TB signs and symptoms, communicating with TB health  
9 170 care workers, and referring a presumptive TB patient to the health facility for further  
10 171 examination in the past six months.

11 172 The participant's characteristics domain items were assessed using closed and short open  
12 173 questions, while the item of knowledge domain was measured on a nominal scale ('true',  
13 174 'false', and 'do not know'). Five Likert scales were used for the attitude, while rating scales  
14 175 were used for practice domain items. We used "strongly agree", "agree", "doubt", "disagree",  
15 176 and "strongly disagree" for the attitude items, and "very often", "often", "sometimes", "rarely",  
16 177 and "never" for the frequency of practice items. The TBPD practice was evaluated over the  
17 178 past six months. The six months were based upon the results of our previous qualitative  
18 179 studies that there was the pharmacy personnel who provided the TBPD practice at least once  
19 180 six months[11,21]. To have a clear definition and comprehensive duration assessment, we  
20 181 defined "very often" as the practice performed at least every week; "often" is the practice  
21 182 performed at least once a month; "sometimes" is the practice performed at least once in 2-4  
22 183 months; "rarely" is the practice performed once in 5-6 months; and "never" is never doing the  
23 184 practice in the last six months.

24 185 We assigned the questionnaire for face and content validation to experts with several  
25 186 backgrounds, i.e., an epidemiologist, a pharmacist, an assistant pharmacist, and a TB  
26 187 specialist. In light of the expert judgments, ISP (TB researcher) and EF (statistician and item  
27 188 developer) finalised the items. A pilot study involving 200 participants who were different from  
28 189 the participants was conducted for the validity and reliability test of the instrument.

#### 29 190 *Study Size, Participant, and Data Collection*

30 191 We included participants who had an educational background as a pharmacist or a pharmacy  
31 192 technician; were working as pharmaceutical workers at the community pharmacy; and had  
32 193 experience in the pharmacy for at least six months. The six-month experience was defined  
33 194 considering that the study captured TBPD activities in the last six months. We excluded  
34 195 participants if they worked outside the pharmacy (e.g., in a community health centre or  
35 196 hospital) or were underqualified according to the national regulation.

36 197 We used pharmacies as the unit sample in this study. An estimated 1,800 pharmacies in all  
37 198 the study sites were defined as the sample frame, considering the government and

1  
2  
3 199 professional organisation data[22]. The study used an online Raosoft® sample size estimator  
4 200 to identify a minimum sample size [23]. In view of a 5% of margin error, 95% confidence level,  
5 201 and 50% response distribution, we identified a total of 317 pharmacies as the minimum sample  
6 202 size in this study.  
7  
8  
9

10 203 Data were obtained from July to October 2021. Considering that pharmacists and pharmacy  
11 204 technicians operate pharmacies, two responsible persons for data collection were appointed  
12 205 in each study site, i.e. a data collector for the pharmacists and one for the pharmacy  
13 206 technicians. We collaborated with the two local professional organisations for data collection.  
14 207 The responsible data collector identified and distributed the questionnaire to the potential  
15 208 participants based on the participant eligibility, database, networking, and geographical  
16 209 distribution at the district level. In light of the pandemic COVID-19 situation, we distributed the  
17 210 questionnaire using online and offline approaches. All the collected data were managed and  
18 211 analysed for eligibility of the data and achievement of the sample size by the researchers at  
19 212 each study site (ISP, Kh, MAB, MNK).  
20  
21  
22  
23  
24  
25

### 26 213 *Data analysis*

27  
28  
29 214 In the pilot study, we tested the item validity using a correlation between the score of each  
30 215 item and the total score. A correlation between items was defined if the  $p$ -value of the Pearson  
31 216 correlation coefficient ( $r$ ) was below 0.05[24].The reliability test was conducted by identifying  
32 217 Cronbach's alpha, which should be more than 0.60 for an acceptably reliable item[25,26].  
33  
34  
35

36 218 Descriptive statistics were used to analyse the characteristics of participants. Categorical data  
37 219 were described as numbers and percentages. Median and interquartile ranges (IQR) were  
38 220 used for continuous and non-normally distributed data. As to the knowledge domain,  
39 221 percentages of participants who had correct answers per item were reported, while in the  
40 222 attitude and practice domain, percentages referred to participants who chose a particular scale  
41 223 in the items.  
42  
43  
44  
45

46 224 We performed a multivariable regression analysis to identify factors associated with the  
47 225 practice of TBPD. The normality of the residual was identified by assessing the shape of the  
48 226 residual histogram and the probability-probability (P-P) plot. Multicollinearity was evaluated by  
49 227 identifying the variance inflation factor (VIF) less than 5[27]. Sub-group analysis was  
50 228 performed to analyse a variable from the multivariable analysis deeper. We used logistic  
51 229 regression analysis in the sub-group analysis when the outcome was binary data, while linear  
52 230 regression analysis was used when the outcome data was numeric. We analysed risk groups  
53 231 for poor TB knowledge and attitude as dependent variables. All significance levels were set at  
54 232 5%, and 95% confidence intervals (CI) were presented. Data management and analysis were  
55 233 performed anonymously, and the analyses were conducted using SPSS version 26.  
56  
57  
58  
59  
60

234 An unpublished protocol was developed prior to the study to provide better study planning and  
235 guidance for the research team. The strengthening of the reporting of observational studies in  
236 epidemiology (STROBE) guideline for a cross-sectional study was followed to achieve  
237 systematic and transparent study reporting[28].

### 238 *Patient and Public Involvement*

239 The research question was developed considering the previous interviews and focus group  
240 discussions involving TB patients, a non-governmental organization, health service providers,  
241 and pharmacists. We involved the representation of professional organizations in pharmacy  
242 for data collection.

243

## 244 **RESULTS**

### 245 *Questionnaire development and validation*

246 In the phase of questionnaire development, all experts agreed that all items could be used for  
247 the research instrument. All items fulfilled the face and content validity with minor structural  
248 and content revisions. A total of 40 items were developed to assess participant characteristics  
249 (16), knowledge (17), attitude (4), and practice (3). After being revised, we distributed the  
250 items to 200 participants for the validity and reliability test.

251 The knowledge, attitude, and practice items were significantly correlated with each total item  
252 ( $p$ -value < 0.05). Similarly, all the knowledge, attitude, and practice items were reliable since  
253 Cronbach's alpha ranged from 0.63 to 0.79. The participants' characteristics, validity, and  
254 reliability test in the pilot study can be seen in **Supplementary files 1, 2, and 3**, respectively.

### 255 *Study Size and Participant Characteristics*

256 We successfully collected data from 979 pharmacies with 1,242 subjects, from much more  
257 than the 317 pharmacies defined as the minimum sample size. However, we excluded 113  
258 subjects due to an under-qualified education level (4) and working outside of the community  
259 pharmacy (109). Finally, we included 1,129 participants for further data analysis. We identified  
260 that the participant backgrounds were relative balance, i.e. 56.6 % were pharmacists, and  
261 43.6% were pharmacy technicians. The flow diagram of the included participants is presented  
262 in **Figure 1**.

263 We identified that the median age, working experience, and average working hours were 29  
264 years old (IQR: 9), three years (IQR: 4), and 40 hours per week (IQR: 48), respectively. The  
265 majority of participants had an educational level at the professional degree of pharmacist



(48.7%) followed by senior high school or equivalent (17.8%) and the rest (33.5%). We assessed that only a small proportion of participants provided drug consultation services in their pharmacies (13.4%). In terms of TB training, almost half of the participants never had TB training (49.3%). The characteristics of the main study participants can be seen in **Table 1**.

**Table 1.** Characteristics of the study participants (n= 1,129)

| No                                       | Characteristics                                                  | Number     |
|------------------------------------------|------------------------------------------------------------------|------------|
| <i>Socio-demographic characteristics</i> |                                                                  |            |
| 1                                        | Female (number, %)                                               | 910 (80.6) |
| 2                                        | Age in year (median, IQR)                                        | 29 (9)     |
| 3                                        | Marital status (number, %)                                       |            |
|                                          | Single                                                           | 480 (42.5) |
|                                          | Married                                                          | 630 (55.8) |
|                                          | Widow/ widower                                                   | 19 (1.7)   |
| 4                                        | Educational level (number, %)                                    |            |
|                                          | Vocational pharmacy school or equivalent                         | 201 (17.8) |
|                                          | Diploma                                                          | 142 (12.6) |
|                                          | Bachelor                                                         | 147 (13.0) |
|                                          | Pharmacist                                                       | 550 (48.7) |
|                                          | Master                                                           | 81 (7.2)   |
|                                          | Doctor                                                           | 8 (0.7)    |
| 5                                        | Number of participants surveyed (number, %)                      |            |
|                                          | City of Bandung                                                  | 240 (21.3) |
|                                          | County of Bandung                                                | 285 (25.2) |
|                                          | City of Makassar                                                 | 280 (24.8) |
|                                          | City of Medan                                                    | 324 (28.7) |
| <i>Professional characteristics</i>      |                                                                  |            |
| 4                                        | Professional background (number, %)                              |            |
|                                          | Pharmacy technicians                                             | 490 (43.4) |
|                                          | Pharmacists                                                      | 639 (56.6) |
| 7                                        | Working experience in years (median, IQR)                        | 3 (4)      |
| 8                                        | Average working time in hours per week (median, IQR)             | 40 (28)    |
| 9                                        | Number of practice places (number, %)                            |            |
|                                          | One pharmacy                                                     | 987 (87.4) |
|                                          | Two pharmacies                                                   | 86 (7.6)   |
|                                          | Three pharmacies                                                 | 6 (0.5)    |
|                                          | More than three pharmacies                                       | 50 (4.4)   |
| 10                                       | Providing drug consultation services (number, %)                 | 151 (13.4) |
| <i>Pharmacy characteristics</i>          |                                                                  |            |
| 11                                       | Type of pharmacy (number, %)                                     |            |
|                                          | Chain pharmacy                                                   | 264 (23.4) |
|                                          | Independent pharmacy                                             | 865 (76.6) |
| 12                                       | Availability of a physician practice in the pharmacy (number, %) | 464 (41.1) |
| <i>TB related characteristics</i>        |                                                                  |            |
| 13                                       | Experience in TB training (number, %)                            |            |
|                                          | Never                                                            | 557 (49.3) |
|                                          | More than two years ago                                          | 225 (19.9) |
|                                          | One-two years ago                                                | 191 (16.9) |
|                                          | Six months - one year ago                                        | 90 (8.0)   |
|                                          | Less than six months ago                                         | 66 (5.8)   |

271 Information: IQR: interquartile

272

273 *Knowledge of pharmacy personnel on Tuberculosis*

274 We assessed that most of the TB knowledge items were correctly answered by the  
 275 participants. However, correct responses concerning TB signs and symptoms, risk population,  
 276 and TB medication were given by no more than 70% of the participants. The participants  
 277 inappropriately answered about general signs of pulmonary TB (70.5%). The participants did  
 278 not know that diabetes mellitus is a risk factor for TB disease (45%). Moreover, although the  
 279 participants had a pharmaceutical background, they were not familiar with the TB treatment  
 280 regimen for drug-sensitive TB and how to take the medication, either with or without food. The  
 281 percentages of participants who correctly answered on the first-line regimen for drug-sensitive  
 282 TB in the intensive treatment phase; the first-line regimen for drug-sensitive TB in the  
 283 continuous treatment phase; and the preferable utilisation of the first-line anti-TB drugs on an  
 284 empty stomach were only 62.4%, 54.5%, and 45.3%, respectively. The proportion of the  
 285 correct answers in the TB knowledge items is presented in **Table 2**.

286 **Table 2.** The items of TB knowledge (n= 1,129)

| No | Concept                   | Items                                                                                                                     | Correct answer (%) |
|----|---------------------------|---------------------------------------------------------------------------------------------------------------------------|--------------------|
| 1  | The pathogen              | Tuberculosis (TB) is caused by virus                                                                                      | 70.9               |
| 2  | TB transmission           | TB does not only spread into the lungs but also to other parts of the body, e.g., eyes, joints, and bone                  | 82.1               |
|    |                           | TB can spread by droplets from coughing or sneezing of a pulmonary TB patient                                             | 97.7               |
|    |                           | The droplet containing the TB pathogen can stay longer in a room with minimum ventilation                                 | 88.5               |
| 3  | TB sign and symptom       | Coughing for more than equal two weeks is a general sign of pulmonary TB                                                  | 82.4               |
|    |                           | An active TB patient can cough up blood                                                                                   | 95.9               |
|    |                           | The general signs of pulmonary TB, i.e., loss of body weight, chest pain, sweat at night, and fever for more than a month | 29.5               |
| 4  | Risk population           | Diabetes mellitus is a risk factor for having TB                                                                          | 55                 |
|    |                           | HIV infection is a risk factor for having TB                                                                              | 84.4               |
|    |                           | Children under five years old is a risk group for TB disease                                                              | 75.6               |
| 5  | TB diagnosis procedure    | A microscopic test of the TB patient's sputum is a diagnostic approach for TB                                             | 87.7               |
|    |                           | A rapid molecular test of the TB patient's sputum is a diagnostic approach for TB                                         | 76.3               |
| 6  | TB medication and its use | The first line anti-tuberculosis regimen for the intensive phase                                                          | 62.4               |
|    |                           | The first line anti-tuberculosis regimen for the continued phase                                                          | 54.5               |

|   |                                           |                                      |      |
|---|-------------------------------------------|--------------------------------------|------|
|   |                                           | Taking anti-TB drugs without food    | 45.3 |
| 7 | Adverse drug reaction and drug monitoring | Adverse drug reactions of isoniazid  | 87.2 |
|   |                                           | Adverse drug reactions of rifampicin | 78.2 |

287

288 *The Attitude of Pharmacy Personnel toward Tuberculosis Patient Detection*

289 Most participants believed they had a role (75.1%) and capability (65.4%) to detect TB patients  
 290 in their pharmacy. The majority of participants also felt guilty if they did not make any effort to  
 291 detect TB patients (67.4%). On the other hand, 58.2% of participants believed they had  
 292 significant barriers to finding TB patients in their workplace. It highlighted that most participants  
 293 realised they faced significant barriers to performing TBPD in their pharmacies. The attitude  
 294 of the participant is presented in **Table 3**.

295 **Table 3.** The items of attitude for TB patient detection (n= 1,129)

| No | Concept               | Items                                                                                    | Percentage (%) |       |       |          |                   |
|----|-----------------------|------------------------------------------------------------------------------------------|----------------|-------|-------|----------|-------------------|
|    |                       |                                                                                          | Strongly agree | Agree | Doubt | Disagree | Strongly disagree |
| 1  | The professional role | I have a role in finding TB patients in my workplace                                     | 21             | 54.1  | 15.1  | 9.2      | 0.6               |
| 2  | The capability        | I can screen TB signs and symptoms for presumptive TB patients who visit my workplace    | 11.9           | 53.5  | 23.1  | 9.8      | 1.7               |
|    |                       | I feel that there are no significant barriers to finding new TB patients in my workplace | 7              | 33.8  | 36.6  | 21.2     | 1.4               |
| 3  | The consequence       | I feel guilty if I do not make any efforts to find new TB patients in my workplace       | 21.2           | 46.2  | 19.1  | 20.6     | 1.8               |

296

297 *The Practice of Pharmacy Personnel toward Tuberculosis Patient Detection*

298 Our study demonstrated that most participants did not always perform practice in TBPD. Only  
 299 a small proportion of the participants routinely conducted TB screening (2%), suggested  
 300 presumptive TB patients for further examination (6.6%), and communicated with TB health  
 301 care providers about referring presumptive TB patients (1.8%) every week in the last six  
 302 months. We assessed that more than 15% of the participants had never performed TBPD in

303 their pharmacy in the last six months. The remaining participants stated that practising TBPD  
 304 was performed once every 2-6 months. The practice of TBPD in the included participants is  
 305 shown in **Table 4**.

306 **Table 4.** The items of the practice in TB patient detection (n= 1,129)

| No | Items                                                                                                                           | Percentage (%) |       |            |        |       |
|----|---------------------------------------------------------------------------------------------------------------------------------|----------------|-------|------------|--------|-------|
|    |                                                                                                                                 | Very often     | Often | Some times | Rarely | Never |
| 1  | Practise in screening TB signs and symptoms for the presumptive TB patient                                                      | 2              | 10.9  | 27.1       | 35.2   | 24.8  |
| 2  | Practice in suggesting presumptive TB patients for further health examination to the community health centre or health facility | 6.6            | 26.8  | 24.4       | 25.8   | 16.4  |
| 3  | Practise communicating with TB health care providers in referring the presumptive TB patient to them                            | 1.8            | 11.1  | 16.5       | 26.5   | 44.2  |

307 **Information:** Very often: at least every week; often: at least every month; sometimes: at least once 2-  
 308 4 months; rarely: at least once 5-6 months; never: never doing the activities in the last six months.

309

### 310 *Factors associated with TB practice and the exploratory analyses*

311 We included all participant characteristics, TB knowledge, and attitude items in a regression  
 312 analysis to identify factors associated with the practice of TBPD. Multicollinearity was identified  
 313 in the factors of education level and professional background. We, therefore, removed the  
 314 determinant of the level of education in the regression analysis. After it had been removed,  
 315 the regression assumption was fulfilled since the residual data were normally distributed and  
 316 no multicollinearity occurred (**Supplementary File 4**)

317 The regression analysis showed that male gender (Beta coefficient,  $B= 0.41$ ;  $p$ -value $<0.05$ ;  
 318 95% confidence interval,  $CI= 0.02- 0.80$ ), providing drug consultation services ( $B= 0.68$ ;  
 319  $p<0.05$ ; 95% $CI= 0.23- 1.14$ ), experience in TB training ( $B= 0.83$ ;  $p<0.001$ ; 95% $CI=$   
 320  $0.52-1.15$ ), working hours per week ( $B= -0.16$ ;  $p<0.05$ ; 95% $CI= -0.03- -0.01$ ), being a  
 321 participant from the county of Bandung ( $B= -0.52$ ;  $p<0.05$ ; 95% $CI= -0.99- -0.05$ ), and a  
 322 positive attitude on TBPD ( $B= 0.34$ ;  $p<.001$ ; 95% $CI= 0.29- 0.40$ ) were significant factors for  
 323 TBPD practice. Of note, the beta coefficients were negative for the factor of working hours and  
 324 for being a participant from the county of Bandung, which means that the factors had negative  
 325 effects on TBPD activities. A higher beta coefficient represented the more influential factors.  
 326 To have a comprehensive picture of the association between gender and TBPD practice, we  
 327 conducted a sub-group analysis of the gender variable. The sub-group analysis showed that  
 328 age, providing drug consultation services, and positive attitude towards TBPD were

329 associated with the male gender. The multivariable regression analysis of the factors  
330 associated with the practice of TBPD and the gender analysis are presented in  
331 **Supplementary Files 4 and 5.**

332 Assuming TB knowledge and attitude were associated with TBPD practice, we explored  
333 factors associated with TB knowledge and attitude. In terms of TB knowledge, we found that  
334 age ( $B= 0.07$ ;  $p < 0.05$ ;  $95\%CI= 0.03- 0.10$ ), being a pharmacist ( $B= 2.2$ ;  $p < 0.001$ ;  $95\%CI=$   
335  $1.68- 2.63$ ), experience in TB training ( $B= 0.65$ ;  $p < 0.001$ ;  $95\%CI= 0.25- 1.04$ ), and a positive  
336 attitude on TBPD ( $B= 0.1$ ;  $p < 0.001$ ;  $95\%CI= 0.03- 0.17$ ) were positively associated with TB  
337 knowledge. Meanwhile, the factors of being a participant from the county of Bandung ( $B= -$   
338  $1.04$ ;  $p < 0.001$ ;  $95\%CI= -1.63- -0.45$ ) and from the city of Makassar ( $B= -1.13$ ;  $p < 0.001$ ;  
339  $95\%CI= -1.70- -0.55$ ) were negatively associated with TB knowledge as compared with being  
340 a participant from the city of Bandung.

341 Regarding the attitude, the analysis demonstrated that factors positively associated with TB  
342 attitude were male gender ( $B= 0.68$ ;  $p < 0.001$ ;  $95\%CI= 0.26- 1.09$ ), TB knowledge ( $B=0.74$ ;  
343  $p < 0.001$ ;  $95\%CI= 0.02- 0.12$ ), provision of drug consultation services ( $B= 0.91$ ;  $p < 0.001$ ;  
344  $95\%CI= 1.40- 0.68$ ), experience in TB training ( $B= 0.84$ ;  $p < 0.001$ ;  $95\%CI= 0.51- 1.16$ ), being  
345 a participant from the county of Bandung ( $B= 0.93$ ;  $p < 0.001$ ;  $95\%CI= 0.44- 1.43$ ) and city of  
346 Makassar ( $B= 0.51$ ;  $p < 0.05$ ;  $95\%CI= 0.02- 0.99$ ). Meanwhile, working in a chain pharmacy  
347 ( $B= -0.64$ ;  $p < 0.001$ ;  $95\%CI= -1.07- -0.21$ ) was negatively associated with TBPD attitude. The  
348 regression analyses on the factors associated with TB knowledge, and attitude, are presented  
349 in **Supplementary File 4.**

350 Generally, our study demonstrated that exposure to TB training is strongly associated with  
351 improving TB knowledge ( $B= 0.65$ ;  $p < 0.001$ ;  $95\%CI= 0.25- 1.04$ ), attitude ( $B= 0.84$ ;  $p < 0.001$ ;  
352  $95\%CI= 0.51- 1.16$ ), and practice ( $B= 0.83$ ;  $p < 0.001$ ;  $95\%CI= 0.52- 1.15$ ) in TBPD.

353

## 354 **DISCUSSION**

355 Our study demonstrated that knowledge of TB as a disease was present among pharmacists  
356 and pharmacy technicians. However, a minority had incorrect responses on TB knowledge  
357 items. Despite their pharmaceutical background, many participants were unfamiliar with the  
358 first-line treatment regimen for drug-susceptible TB. As to their attitude, most participants  
359 showed a role and capacity to detect TB patients in their pharmacy, but they realised  
360 significant barriers in performing TBPD. In this respect, only a small proportion of participants  
361 already performed TBPD practices in their community pharmacies.

1  
2  
3 362 In terms of TB knowledge, our participants showed a high understanding of several topics,  
4 363 such as TB transmission, diagnostic procedures, and potential adverse drug reactions.  
5 364 However, the participants should be strengthened in their knowledge about TB signs and  
6 365 symptoms, risk population, and medication since those knowledge scores were relatively low.  
7 366 Good knowledge was associated with participants who have a pharmacist background. This  
8 367 finding highlights the importance of exposing TB knowledge to the pharmacy technicians since  
9 368 they also have a role as the frontline in pharmacy. Unintegrated pharmaceutical services in  
10 369 TB programs and a lack of public-private collaboration with community pharmacies were  
11 370 reported in Indonesia.[11,21] This potentially leads to the limited exposure of community  
12 371 pharmacy personnel to the educational program from the national TB programme.

13 372 Insufficient TB knowledge was also reported by a private retail survey in Tanzania that  
14 373 demonstrated that the observed participants did not fully understand TB symptoms and the  
15 374 risk factors of TB[29]. Although some items are slightly different across the studies, studies on  
16 375 community pharmacies in Peru[30], Tanzania[29], and Pakistan[20] showed that community  
17 376 pharmacy personnel has the basic knowledge of TB that can support them in conducting  
18 377 activities in TBPD.

19 378 Practising TBPD in the pharmacy was associated with experience in TB training, a positive  
20 379 attitude towards TBPD, provision of drug consultation services, male gender, short working  
21 380 hours per week, and pharmacies located in central city areas. We finally found that experience  
22 381 in following TB training is essential for improving TB knowledge, forming a positive attitude,  
23 382 and performing activities on TBPD. Our study thus emphasises the importance of TB training  
24 383 to gain TB knowledge and a positive attitude. The knowledge and attitude can then generate  
25 384 action for TBPD. It is in line with the knowledge, attitude, and practice (KAP) theory that states  
26 385 that the changes in human behaviour are divided into three successive processes, i.e.,  
27 386 knowledge acquisition, the generation of attitudes, and the formation of behaviour [31]. In the  
28 387 health belief model, knowledge plays a key role in generating action, and then belief and  
29 388 attitude drive behaviour change[32].

30 389 Next to TB training and a positive attitude, we identified other factors relevant to the TBPD  
31 390 practice, such as male gender and providing drug consultation services. We identified that the  
32 391 proportion of females (80.6%) is higher than males (19.4%) in our study. It is in line with  
33 392 national data showing that females represent the majority of pharmaceutical personnel in  
34 393 Indonesia (80.6%)[33]. Although the proportion of females is higher than males, our study  
35 394 identified that males are more likely to perform TBPD practices. Our sub-group analysis  
36 395 explained that males have a more positive attitude towards TBPD and provide more drug  
37 396 consultation services than females (See **Supplementary File 5**). The positive attitude may  
38 397 drive them to provide the drug consultation service and lead them to perform TBPD activities

1  
2  
3 398 as well. It can be explained that providing drug consultation services will give them more  
4  
5 399 opportunities to meet patients directly, leading to the TBPD activities. However, further study  
6  
7 400 is needed to have a more comprehensive picture of the associations that include other relevant  
8  
9 401 variables.

10 402 Furthermore, we assessed that time available to perform TBPD activities is essential. Our  
11  
12 403 study emphasised the need for workload assessment for the community pharmacies to be  
13  
14 404 able to conduct TBPD activities. This conclusion is supported by a KAP study in Peru that  
15  
16 405 showed that lack of time is the main problem in managing TB patient management among  
17  
18 406 pharmacies[30]. Supporting our findings, studies in India and Indonesia identified that patient  
19  
20 407 volume and workload are the barriers to performing TBPD activities and pharmaceutical  
21  
22 408 services in community pharmacies[34,35].

23 409 In the geographical aspect, our study revealed that pharmacy personnel in a peripheral city  
24  
25 410 area has fewer TBPD practices than the pharmacy personnel in the central city. However, the  
26  
27 411 differences in knowledge and attitude between the areas cannot be analysed clearly. This  
28  
29 412 finding underlines that unidentified factors other than knowledge and attitude may affect the  
30  
31 413 practice of TBPD in a particular area. A systematic review describes that several factors can  
32  
33 414 affect health care practices, such as guidelines, individual healthcare providers, patients,  
34  
35 415 professional interaction, incentives and resources, capacity for organizational change, social,  
36  
37 416 political, and legal factors[36]. Hence, a comprehensive analysis may be beneficial to analyse  
38  
39 417 the geographical effect on the TBPD activities.

40 418 This study, however, has limitations. First, this is a self-reported study that may be biased by  
41  
42 419 social desirability. This means that participants may respond in a socially acceptable way that  
43  
44 420 contradicts the facts. Second, formally no causal relations can be inferred between factors  
45  
46 421 related to patient characteristics, knowledge, and attitude on the one hand and TBPD practice  
47  
48 422 on the other hand since the nature of a cross-sectional study does not consider the time  
49  
50 423 difference between the causal factors and the eventual effect. However, several efforts were  
51  
52 424 made to minimize potential bias and increase this study's validity and reliability. We stated in  
53  
54 425 the questionnaire that data would be analysed and presented anonymously. This can minimize  
55  
56 426 social desirability bias since the participant's identity would be unknown. We also collaborated  
57  
58 427 with professional organizations that have a broad network and a list of pharmacies in the study  
59  
60 428 sites for data collection. Hence, we reached a high number of pharmacies and participants  
429 that could be considered highly representative of the target population.

430 We analysed that the community pharmacy is a potential facility to increase TBPD. It considers  
431 that most community pharmacy personnel already has certain basic knowledge and a positive  
432 attitude toward TBPD. Moreover, the evidence shows that they are indeed the main facility to

1  
2  
3 433 seek first aid medication for TB patients[3–8]. Other evidence from India, Pakistan, and  
4 434 Tanzania also supported that community pharmacies can help in detecting TB patients in the  
5 435 community[37–39]. However, a comprehensive strategy is required to follow up on this study  
6 436 to implement TBPD activities among pharmacy personnel.  
7  
8  
9

10 437 First, further study is needed to comprehensively analyse the local determinants affecting  
11 438 TBPD activities, including guidelines, patients, professional interactions, incentives,  
12 439 resources, capacity for organizational change, and social, political, and legal factors. A  
13 440 qualitative study may be beneficial to explore in detail voices from the field related to the local  
14 441 determinants and partnership strategies from the relevant stakeholders. A future intervention  
15 442 can then be developed based on the identified local determinants and partnership strategies.  
16 443 Second, a TB training system for improving the KAP should be developed for pharmacy  
17 444 personnel. The training is not only for increasing TB awareness about case detection activities  
18 445 but also for minimising irrational dispense of TB drugs[40] and raising awareness on the other  
19 446 potential roles of community pharmacy in TB (e.g., treatment supporter, TB medication  
20 447 counsellor). As a treatment supporter, pharmacy personnel can potentially reduce the clinical  
21 448 and economic impacts of TB medication adherence[41–43]. Third, integrating the role of  
22 449 community pharmacy in TB patient management within National Tuberculosis Programs  
23 450 (NTPs) is essential to have the same vision and concept in accelerating TB elimination. Finally,  
24 451 technical guidance for performing TBPD in pharmacies and integrating the activities in NTPs  
25 452 should also be developed to have a successful community pharmacy engagement program,  
26 453 especially in TBPD activities.  
27  
28  
29  
30  
31  
32  
33  
34  
35  
36  
37  
38

454

## 39 455 **CONCLUSION**

40  
41 456 Our study showed that most Indonesian pharmacists and pharmacy technicians have a good  
42 457 knowledge and attitude related to TBPD. However, their knowledge and attitude do not align  
43 458 with their actual TBPD practice. We identified that a TB educational program is essential in  
44 459 improving KAP among pharmacy personnel for TBPD activities. A systematic and  
45 460 comprehensive assessment is needed to develop an effective strategy for engaging the  
46 461 community pharmacy in sustainable TBPD activities.  
47  
48  
49  
50  
51  
52  
53  
54  
55  
56  
57  
58  
59  
60

462

463

464

465



## 466 REFERENCES

- 467 1 WHO. Global tuberculosis report 2021. Geneva: 2021.
- 468 2 Miller R, Goodman C. Quality of tuberculosis care by pharmacies in low- and middle-  
469 income countries: Gaps and opportunities. *J Clin Tuberc Other Mycobact Dis*  
470 Published Online First: 2020. doi:10.1016/j.jctube.2019.100135
- 471 3 Lestari BW, McAllister S, Hadisoemarto PF, *et al.* Patient pathways and delays to  
472 diagnosis and treatment of tuberculosis in an urban setting in Indonesia. *Lancet Reg*  
473 *Heal – West Pacific* 2020;**5**:59. doi:10.1016/J.LANWPC.2020.100059
- 474 4 Surya A, Setyaningsih B, Suryani Nasution H, *et al.* Quality Tuberculosis Care in  
475 Indonesia: Using Patient Pathway Analysis to Optimize Public-Private Collaboration. *J*  
476 *Infect Dis* 2017;**216**:S724–32. doi:10.1093/infdis/jix379
- 477 5 Lönnroth K, Uplekar M, Blanc L. Hard gains through soft contracts: productive  
478 engagement of private providers in tuberculosis control. *Bull World Health Organ*  
479 2006;**84**:876–83. doi:10.2471/BLT.06.029983
- 480 6 Daftary A, Jha N, Pai M. Enhancing the role of pharmacists in the cascade of  
481 tuberculosis care. *J Epidemiol Glob Health* 2016;**7**:1–4.  
482 doi:10.1016/J.JEGH.2016.05.001
- 483 7 Kiwuwa MS, Charles K, Harriet MK. Patient and health service delay in pulmonary  
484 tuberculosis patients attending a referral hospital: a cross-sectional study. *BMC Public*  
485 *Health* 2005;**5**. doi:10.1186/1471-2458-5-122
- 486 8 Sreeramareddy CT, Qin ZZ, Satyanarayana S, *et al.* Delays in diagnosis and  
487 treatment of pulmonary tuberculosis in India: a systematic review. *Int J Tuberc Lung*  
488 *Dis* 2014;**18**:255–66. doi:10.5588/IJTL.13.0585
- 489 9 Satyanarayana S, Kwan A, Daniels B, *et al.* Use of standardised patients to assess  
490 antibiotic dispensing for tuberculosis by pharmacies in urban India: a cross-sectional  
491 study. *Lancet Infect Dis* 2016;**16**:1261–8. doi:10.1016/S1473-3099(16)30215-8
- 492 10 Zawahir S, Le H, Nguyen TA, *et al.* Standardised patient study to assess tuberculosis  
493 case detection within the private pharmacy sector in Vietnam. *BMJ Glob Heal*  
494 2021;**6**:e006475. doi:10.1136/BMJGH-2021-006475
- 495 11 Pradipta IS, Idrus LR, Probandari A, *et al.* Barriers and strategies to successful  
496 tuberculosis treatment in a high-burden tuberculosis setting: a qualitative study from  
497 the patient's perspective. *BMC Public Heal* 2021 211 2021;**21**:1–12.  
498 doi:10.1186/S12889-021-12005-Y
- 499 12 Badan Pusat Statistik. Badan Pusat Statistik. 2017;:335–58. doi:10.1055/s-2008-  
500 1040325
- 501 13 Ministry of health Republic of Indonesia. Peraturan Menteri Kesehatan Republik  
502 Indonesia. 2011.
- 503 14 WHO. *Advocacy, communication and social mobilization for TB control. A guide to*  
504 *developing knowledge, attitude and practice surveys.* 2008.
- 505 15 Ruel E, Wagner III WE, Gillespie BJ. *The Practice of Survey Research: Theory and*  
506 *Applications.* 2016. doi:10.4135/9781483391700
- 507 16 Ministry of health Republic of Indonesia. Peraturan menteri kesehatan Republik  
508 Indonesia no 67 tahun 2016 tentang penanggulangan tuberculosis. 2010.
- 509 17 Michie S, Johnston M, Abraham C, *et al.* Making psychological theory useful for

- 1  
2  
3 510 implementing evidence based practice: A consensus approach. In: *Quality and Safety*  
4 511 *in Health Care*. 2005. doi:10.1136/qshc.2004.011155  
5  
6 512 18 Farhanah AW, Sarimah A, Jafri Malin A, *et al*. Updates on knowledge, attitude and  
7 513 preventive practices on tuberculosis among healthcare workers. *Malaysian J. Med.*  
8 514 *Sci*. 2016. doi:10.21315/mjms2016.23.6.3  
9  
10 515 19 Alotaibi B, Yassin Y, Mushi A, *et al*. Tuberculosis knowledge, attitude and practice  
11 516 among healthcare workers during the 2016 Hajj. *PLoS One* Published Online First:  
12 517 2019. doi:10.1371/journal.pone.0210913  
13  
14 518 20 Mustafa T, Shahzad Y, Kiani A. A survey of knowledge, attitude, and practices of  
15 519 private retail pharmacies staff in tuberculosis care: Study from Dera Ismail Khan City,  
16 520 Pakistan. *J Pharm Policy Pract* Published Online First: 2018. doi:10.1186/s40545-  
17 521 018-0134-1  
18  
19 522 21 Pradipta IS, Idrus LR, Probandari A, *et al*. Barriers to Optimal Tuberculosis Treatment  
20 523 Services at Community Health Centers: A Qualitative Study From a High Prevalent  
21 524 Tuberculosis Country. *Front Pharmacol* 2022;**0**:936.  
22 525 doi:10.3389/FPHAR.2022.857783  
23  
24 526 22 Jumlah Apotek Berdasarkan Kabupaten/Kota di Jawa Barat.  
25 527 [https://opendata.jabarprov.go.id/id/dataset/jumlah-apotek-berdasarkan-](https://opendata.jabarprov.go.id/id/dataset/jumlah-apotek-berdasarkan-kabupatenkota-di-jawa-barat)  
26 528 [kabupatenkota-di-jawa-barat](https://opendata.jabarprov.go.id/id/dataset/jumlah-apotek-berdasarkan-kabupatenkota-di-jawa-barat) (accessed 2 Nov 2021).  
27  
28 529 23 Sample Size Calculator by Raosoft, Inc. <http://www.raosoft.com/samplesize.html>  
29 530 (accessed 26 Oct 2021).  
30  
31 531 24 Cohen , Swerdlik, Mark E., RJ. *Psychological testing and assessment : an*  
32 532 *introduction to tests and measurement*. 2018.  
33  
34 533 25 Taber KS. The Use of Cronbach's Alpha When Developing and Reporting Research  
35 534 Instruments in Science Education. *Res Sci Educ* 2018;**48**:1273–96.  
36 535 doi:10.1007/S11165-016-9602-2/TABLES/1  
37  
38 536 26 van Griethuijsen RALF, van Eijck MW, Haste H, *et al*. Global Patterns in Students'  
39 537 Views of Science and Interest in Science. *Res Sci Educ* 2014 454 2014;**45**:581–603.  
40 538 doi:10.1007/S11165-014-9438-6  
41  
42 539 27 Vatcheva KP, Lee M, McCormick JB, *et al*. Multicollinearity in Regression Analyses  
43 540 Conducted in Epidemiologic Studies. *Epidemiol (Sunnyvale, Calif)* 2016;**6**.  
44 541 doi:10.4172/2161-1165.1000227  
45  
46 542 28 von Elm E, Altman DG, Egger M, *et al*. The Strengthening the Reporting of  
47 543 Observational Studies in Epidemiology (STROBE) statement: guidelines for reporting  
48 544 observational studies. *Lancet* 2007;**370**:1453–7. doi:10.1016/S0140-6736(07)61602-X  
49  
50 545 29 Rutta E, Tarimo A, Delmotte E, *et al*. Understanding private retail drug outlet  
51 546 dispenser knowledge and practices in tuberculosis care in Tanzania. *Int J Tuberc*  
52 547 *Lung Dis* 2014;**18**:1108–13. doi:10.5588/ijtld.14.0020  
53  
54 548 30 García PJ, Hernández-Córdova G, Pourjavaheri P, *et al*. Knowledge, attitudes and  
55 549 practices related to tuberculosis in pharmacy workers in a cross-sectional survey in El  
56 550 Agustino, Peru. *PLoS One* 2018;**13**. doi:10.1371/journal.pone.0196648  
57  
58 551 31 Fan Y, Zhang S, Li Y, *et al*. Development and psychometric testing of the Knowledge,  
59 552 Attitudes and Practices (KAP) questionnaire among student Tuberculosis (TB)  
60 553 Patients (STBP-KAPQ) in China. *BMC Infect Dis* 2018 181 2018;**18**:1–10.  
61 554 doi:10.1186/S12879-018-3122-9

- 1  
2  
3 555 32 Rosenstock IM. Historical Origins of the Health Belief Model:  
4 556 <http://dx.doi.org/10.1177/109019817400200403> 1974;**2**:328–35.  
5 557 doi:10.1177/109019817400200403  
6  
7 558 33 Ministry of Health Republic of Indonesia. Health Information System 2020. Jakarta:  
8 559 2021.  
9  
10 560 34 Gayathri P, Shah PB, Rajanandh MG. Barriers of community pharmacists in  
11 561 identification and referral of presumptive tuberculosis cases in Tiruvallur district of  
12 562 Tamil Nadu. *Indian J Tuberc* 2020;**67**:560–3. doi:10.1016/j.ijtb.2020.07.018  
13  
14 563 35 Abdulah R, Barliana MI, Pradipta IS, *et al.* Assessment of patient care indicators at  
15 564 community pharmacies in Bandung City, Indonesia. *Southeast Asian J Trop Med*  
16 565 *Public Health* 2014;**45**:1196–201.  
17  
18 566 36 Flottorp SA, Oxman AD, Krause J, *et al.* A checklist for identifying determinants of  
19 567 practice: A systematic review and synthesis of frameworks and taxonomies of factors  
20 568 that prevent or enable improvements in healthcare professional practice. *Implement*  
21 569 *Sci* 2013 **8**:1–11. doi:10.1186/1748-5908-8-35  
22  
23 570 37 Daftary A, Satyanarayana S, Jha N, *et al.* Can community pharmacists improve  
24 571 tuberculosis case finding? A mixed methods intervention study in India. *BMJ Glob*  
25 572 *Heal* 2019;**4**:e001417. doi:10.1136/bmjgh-2019-001417  
26  
27 573 38 Ullah W, Almansour H, Fatima R, *et al.* Engaging Community Pharmacies in Early  
28 574 Detection of Missing Tuberculosis Patients through Public–Private Mix Intervention in  
29 575 Pakistan. *Am J Trop Med Hyg* 2020;**103**:221–30. doi:10.4269/AJTMH.19-0939  
30  
31 576 39 Colvin C, Mugyabuso J, Munuo G, *et al.* Evaluation of community-based interventions  
32 577 to improve TB case detection in a rural district of Tanzania. *Glob Heal Sci Pract*  
33 578 2014;**2**:219–25. doi:10.9745/GHSP-D-14-00026  
34  
35 579 40 Wulandari LPL, Khan M, Liverani M, *et al.* Prevalence and determinants of  
36 580 inappropriate antibiotic dispensing at private drug retail outlets in urban and rural  
37 581 areas of Indonesia: a mixed methods study. *BMJ Glob Heal* 2021;**6**:e004993.  
38 582 doi:10.1136/BMJGH-2021-004993  
39  
40 583 41 Chimeh RA, Gafar F, Pradipta IS, *et al.* Clinical and economic impact of medication  
41 584 non-adherence in drug-susceptible tuberculosis: a systematic review. *Int J Tuberc*  
42 585 *lung Dis Off J Int Union against Tuberc Lung Dis* 2020;**24**:811–9.  
43 586 doi:10.5588/ijtld.19.0754  
44  
45 587 42 Pradipta I, Houtsma D, van Boven JFM, *et al.* Interventions to improve medication  
46 588 adherence in tuberculosis patients: a systematic review of randomized controlled  
47 589 studies. *NPJ Prim care Respir Med* 2020;**30**:21. doi:10.1038/s41533-020-0179-x  
48  
49 590 43 Ridho A, Alfian SD, van Boven J, *et al.* Digital Health Technologies to Improve  
50 591 Medication Adherence and Treatment Outcomes in Patients With Tuberculosis:  
51 592 Systematic Review of Randomized Controlled Trials. *J Med Internet Res*  
52 593 2022;**24**(2)e33062 <https://www.jmir.org/2022/2/e33062> 2022;**24**:e33062.  
53 594 doi:10.2196/33062  
54  
55 595  
56 596  
57 597  
58 598  
59  
60

1  
2  
3 599 **Acknowledgement**  
4

5 600 We wish to thank Indonesian Pharmacist Association (*IAI = Ikatan Apoteker Indonesia*) and  
6 601 Pharmacy Technician Association (*PAFI = Perhimpunan Ahli Farmasi Indonesia*), who  
7  
8 602 supported this study.  
9

10  
11 603 **Competing interests**  
12

13 604 The authors declare no competing interests.  
14

15 605 **Author contribution**  
16

17 606 Main idea: ISP; Conception and design of the work: ISP, Kh, MAB, EF; Data acquisition: ISP,  
18 607 Kh, MAB, MNK; Data analysis and interpretation: ISP, EF, RA, REA, RR; Preparing the first  
19 608 draft: ISP; Substantial revision of the manuscript: all authors; approval for the final manuscript:  
20  
21 609 all authors  
22  
23

24 610 **Funding**  
25

26 611 We acknowledge the PPKI (*Program Penelitian Kolaborasi Indonesia*) funding program 2021  
27 612 for Ivan S. Pradipta (Universitas Padjadjaran) and Kharunnisa (Universitas Sumatera Utara).  
28  
29 613 This funding source had no role in the concept development, study design, data analysis, or  
30 614 article preparation.  
31  
32

33  
34 615 **Ethics declarations**  
35

36 616 This study was approved by the ethics committee of Universitas Sumatera Utara No.  
37 617 599/KEP/USU/2021. All methods were carried out in accordance with the principles of the  
38  
39 618 declaration of Helsinki.  
40

41 619 **Data availability statement**  
42

43 620 Data are available upon reasonable request. The data were managed at the Department of  
44 621 Pharmacology and Clinical Pharmacy, Universitas Padjadjaran, under the supervision of Ivan  
45  
46 622 S. Pradipta, PhD.  
47  
48

49 623 **Figure Legends.**  
50

51 624 **Figure 1.** The flow diagram of the included participants  
52  
53  
54  
55  
56  
57  
58  
59  
60

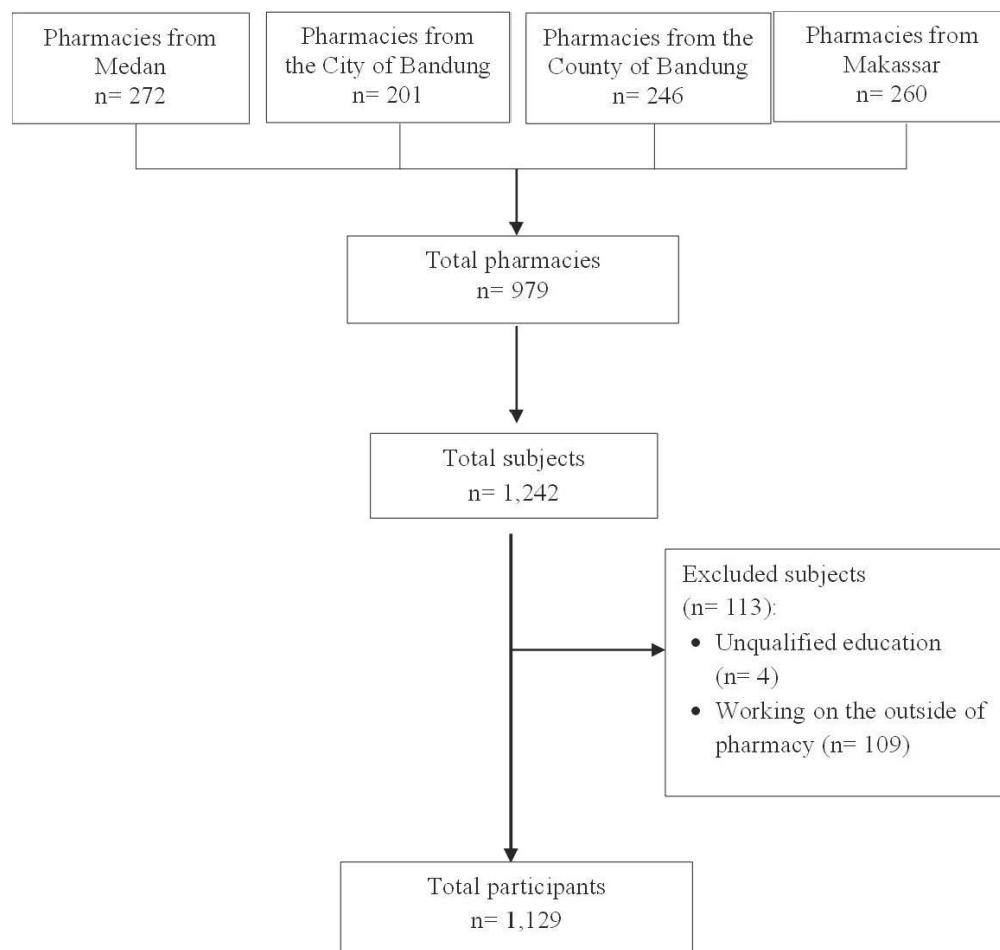

37  
38  
39  
40  
41  
42  
43  
44  
45  
46  
47  
48  
49  
50  
51  
52  
53  
54  
55  
56  
57  
58  
59  
60

Figure 1. The flow diagram of the included participants

306x290mm (96 x 96 DPI)

**SUPPLEMENTARY FILE**

**Supplementary File 1.** Characteristics of the study participants in the validity and reliability test(n= 200)

| No | The characteristics                              | Number      |
|----|--------------------------------------------------|-------------|
| 1  | Female (number, %)                               | 175 (87.50) |
| 2  | Marital status (number, %)                       |             |
|    | Single                                           | 65 (32.50)  |
|    | Married                                          | 129 (64.50) |
|    | Widow/ widower                                   | 6 (3.0)     |
| 3  | Type of the professional background (number, %)  |             |
|    | Pharmacy technicians                             | 49 (24.50)  |
|    | Pharmacist                                       | 151 (75.50) |
| 4  | Educational level (number, %)                    |             |
|    | Senior high school or equivalent                 | 4 (2)       |
|    | Diploma                                          | 28 (14)     |
|    | Bachelor                                         | 15 (70.50)  |
|    | Pharmacist                                       | 141 (70.50) |
|    | Master                                           | 12 (6)      |
|    | Doctor                                           | 0           |
| 5  | Type of pharmacy (number, %)                     |             |
|    | Chain pharmacy                                   | 35 (17.50)  |
|    | Independent pharmacy                             | 165 (82.50) |
| 6  | The number of practice place (number, %)         |             |
|    | One pharmacy                                     | 173 (86.50) |
|    | Two pharmacies                                   | 20 (10)     |
|    | Three pharmacies                                 | 3 (1.50)    |
|    | More than three pharmacies                       | 4 (2)       |
| 7  | Providing drug consultation services (number, %) | 30 (15)     |
| 8  | Experiencing in TB training (number, %)          |             |
|    | Never                                            | 93 (46.50)  |
|    | More than two years ago                          | 47 (23.50)  |
|    | One- two years ago                               | 33 (16.50)  |
|    | Six months - one year ago                        | 23 (11.50)  |
|    | Less than six months ago                         | 4 (2)       |

**Supplementary File 2.** Item correlation with Pearson test (n= 200)

| Domain    | Items | Coefficient validity (r) | p-value |
|-----------|-------|--------------------------|---------|
| Knowledge | K1    | 0.439                    | 0.00    |
|           | K2    | 0.422                    | 0.00    |
|           | K3    | 0.149                    | 0.04    |
|           | K4    | 0.172                    | 0.02    |
|           | K5    | 0.241                    | 0.00    |
|           | K6    | 0.166                    | 0.02    |
|           | K7    | 0.611                    | 0.00    |
|           | K8    | 0.385                    | 0.00    |
|           | K9    | 0.441                    | 0.00    |
|           | K10   | 0.259                    | 0.00    |
|           | K11   | 0.332                    | 0.00    |
|           | K12   | 0.298                    | 0.00    |
|           | K13   | 0.530                    | 0.00    |
|           | K14   | 0.585                    | 0.00    |
|           | K15   | 0.364                    | 0.00    |
|           | K16   | 0.512                    | 0.00    |
|           | K17   | 0.463                    | 0.00    |
| Attitude  | A1    | 0.715                    | 0.00    |
|           | A2    | 0.793                    | 0.00    |
|           | A3    | 0.661                    | 0.00    |
|           | A4    | 0.720                    | 0.00    |
| Practice  | P1    | 0.845                    | 0.00    |
|           | P2    | 0.884                    | 0.00    |
|           | P3    | 0.795                    | 0.00    |

**Supplementary File 3.** Reliability test of the items (n= 200)

| Domain    | Cronbach's Alpha |
|-----------|------------------|
| Knowledge | 0.63             |
| Attitude  | 0.69             |
| Practice  | 0.79             |

**Information:** \*Reliable if the Cronbach's alpha is more than 0.60

Supplementary File 4. The multivariable linear regression analysis for factors associated with knowledge, attitude and practice of TBPD (n=1,125).

| No | Variables                                         | Knowledge* |         |        |       | Attitude** |         |        |       | Practice*** |         |        |       |
|----|---------------------------------------------------|------------|---------|--------|-------|------------|---------|--------|-------|-------------|---------|--------|-------|
|    |                                                   | B          | p-value | 95% CI |       | B          | p-value | 95% CI |       | B           | p-value | 95% CI |       |
|    |                                                   |            |         | Min.   | Max.  |            |         | Min.   | Max.  |             |         | Min.   | Max.  |
| 1  | Male gender <sup>¥\$</sup>                        | -0.31      | 0.22    | -0.81  | 0.18  | 0.68       | 0.00    | 0.26   | 1.09  | 0.41        | .039    | 0.02   | 0.80  |
| 2  | Age                                               | 0.07       | 0.00    | 0.03   | 0.10  | 0.01       | 0.47    | -0.02  | 0.04  | -0.02       | .205    | -0.05  | 0.01  |
| 3  | Married status <sup>€</sup>                       | -0.22      | 0.36    | -0.69  | 0.25  | 0.18       | 0.37    | -0.22  | 0.58  | 0.25        | .186    | -0.12  | 0.63  |
| 4  | Pharmacist                                        | 2.15       | 0.00    | 1.68   | 2.63  | 0.12       | 0.56    | -0.29  | 0.54  | -0.17       | .385    | -0.56  | 0.22  |
| 5  | Chain pharmacy <sup>¶</sup>                       | 0.48       | 0.06    | -0.03  | 0.99  | -0.64      | 0.00    | -1.07  | -0.21 | 0.29        | .166    | -0.12  | 0.69  |
| 6  | Working experience                                | -0.01      | 0.66    | -0.05  | 0.03  | -0.03      | 0.10    | -0.07  | 0.01  | 0.02        | .256    | -0.02  | 0.06  |
| 7  | Working hour per week                             | -0.00      | 0.84    | -0.01  | 0.01  | -0.01      | 0.26    | -0.02  | 0.00  | -0.16       | .001    | -0.03  | -0.01 |
| 8  | Providing drug consultation services <sup>#</sup> | -0.16      | 0.59    | -0.73  | 0.42  | 0.91       | 0.00    | 0.43   | 1.40  | 0.68        | .003    | 0.23   | 1.14  |
| 9  | Experiencing TB training                          | 0.65       | 0.00    | 0.25   | 1.04  | 0.84       | 0.00    | 0.51   | 1.16  | 0.83        | .000    | 0.52   | 1.15  |
| 10 | Two practice locations <sup>£</sup>               | -0.60      | 0.19    | -1.33  | 0.13  | 0.16       | 0.61    | -0.46  | 0.78  | 0.30        | .319    | -0.29  | 0.87  |
| 11 | Three or more practice locations <sup>£</sup>     | -0.48      | 0.31    | -1.40  | 0.45  | -0.10      | 0.81    | -0.87  | 0.68  | 0.13        | .738    | -0.61  | 0.86  |
| 12 | County of Bandung' site <sup>‡</sup>              | -1.04      | 0.00    | -1.63  | -0.45 | 0.93       | 0.00    | 0.44   | 1.43  | -0.52       | .031    | -0.99  | -0.05 |
| 13 | City of Makassar' site <sup>‡</sup>               | -1.13      | 0.00    | -1.70  | -0.55 | 0.51       | 0.04    | 0.02   | 0.99  | 0.06        | .785    | -0.40  | 0.52  |
| 14 | City of Medan' site <sup>‡</sup>                  | -0.47      | 0.11    | -1.06  | 0.11  | 0.21       | 0.40    | -0.28  | 0.71  | -0.17       | .482    | -0.63  | 0.30  |
| 15 | TB knowledge                                      | n.a        | n.a     | n.a    | n.a   | 0.07       | 0.00    | 0.02   | 0.12  | 0.02        | .363    | -0.03  | 0.07  |
| 16 | Positive attitude in TB case detection            | 0.10       | 0.00    | 0.03   | 0.17  | n.a        | n.a     | n.a    | n.a   | 0.34        | .000    | 0.29   | 0.40  |
| 17 | Availability of medical doctor practice           | 0.31       | 0.15    | -0.11  | 0.72  | 0.02       | 0.91    | -0.33  | 0.37  | 0.22        | .184    | -0.11  | 0.55  |

**Information:** \*R<sup>2</sup>= 0.18; \*\*R<sup>2</sup>= 0.09; \*\*\*R<sup>2</sup>= 0,2; B= Beta coefficient; CI: confidence interval; Min: Minimum; Max: maximum; n.a: not applicable; The reference group= ¥Female, €unmarried status, \$assistant pharmacist, ¶Singlepharmacy, #No drug consultation service, £one practice location, ‡City of Bandung location; red colour: p-value < 0.05



**Supplementary File 5.** The multivariable logistic regression for sub-group analysis of the characteristics male gender among the participants (n= 1,125)

| Variables                                        | p-value | Odds ratio | 95% CI |      |
|--------------------------------------------------|---------|------------|--------|------|
|                                                  |         |            | Min.   | Max. |
| <b>Participant characteristics</b>               |         |            |        |      |
| Married status <sup>€</sup>                      | 0.13    | 0.75       | 0.51   | 1.09 |
| Age*                                             | 0.00    | 1.05       | 1.02   | 1.08 |
| <b>Professional characteristics</b>              |         |            |        |      |
| Pharmacist <sup>§</sup>                          | 0.34    | 1.21       | 0.82   | 1.79 |
| Chain Pharmacist <sup>  </sup>                   | 0.11    | 1.39       | 0.93   | 2.08 |
| Working experience                               | 0.91    | 1.00       | 0.97   | 1.03 |
| Providing drug information service <sup>#*</sup> | 0.02    | 1.68       | 1.10   | 2.56 |
| Availability of medical doctor practice          | 0.51    | 1.12       | 0.80   | 1.55 |
| Experience in TB training                        | 0.71    | 0.94       | 0.69   | 1.29 |
| Working hours per week                           | 0.34    | 1.00       | 0.99   | 1.02 |
| Two practice locations <sup>£</sup>              | 0.21    | 1.40       | 0.83   | 2.37 |
| Three practice locations <sup>£</sup>            | 0.76    | 0.89       | 0.42   | 1.88 |
| <b>Study Sites</b>                               |         |            |        |      |
| County of Bandung <sup>‡</sup>                   | 0.10    | 1.47       | 0.93   | 2.33 |
| Makassar <sup>‡</sup>                            | 0.53    | 0.86       | 0.54   | 1.37 |
| Medan <sup>‡</sup>                               | 0.61    | 0.88       | 0.54   | 1.43 |
| <b>Knowledge and Attitude on TBPD</b>            |         |            |        |      |
| Knowledge                                        | 0.24    | 0.97       | 0.93   | 1.02 |
| Attitude*                                        | 0.00    | 1.10       | 1.04   | 1.16 |

**Information:** \* The significant variable (p<0.05); Reference group= <sup>€</sup>unmarried status, <sup>§</sup>pharmacy technician, <sup>||</sup>Single pharmacy, <sup>#</sup>No drug consultation service, <sup>£</sup>one practice location, <sup>‡</sup>City of Bandung location; CI: Confidence Interval; red colour: p-value < 0.05

STROBE Statement—Checklist of items that should be included in reports of *cross-sectional studies*

|                              | Item No | Recommendation                                                                                                                                                                                    | Page No      |
|------------------------------|---------|---------------------------------------------------------------------------------------------------------------------------------------------------------------------------------------------------|--------------|
| <b>Title and abstract</b>    | 1       | (a) Indicate the study's design with a commonly used term in the title or the abstract                                                                                                            | 1            |
|                              |         | (b) Provide in the abstract an informative and balanced summary of what was done and what was found                                                                                               | 2            |
| <b>Introduction</b>          |         |                                                                                                                                                                                                   |              |
| Background/rationale         | 2       | Explain the scientific background and rationale for the investigation being reported                                                                                                              | 4            |
| Objectives                   | 3       | State specific objectives, including any prespecified hypotheses                                                                                                                                  | 4            |
| <b>Methods</b>               |         |                                                                                                                                                                                                   |              |
| Study design                 | 4       | Present key elements of study design early in the paper                                                                                                                                           | 5            |
| Setting                      | 5       | Describe the setting, locations, and relevant dates, including periods of recruitment, exposure, follow-up, and data collection                                                                   | 5            |
| Participants                 | 6       | (a) Give the eligibility criteria, and the sources and methods of selection of participants                                                                                                       | 5            |
| Variables                    | 7       | Clearly define all outcomes, exposures, predictors, potential confounders, and effect modifiers. Give diagnostic criteria, if applicable                                                          | 6-7          |
| Data sources/<br>measurement | 8*      | For each variable of interest, give sources of data and details of methods of assessment (measurement). Describe comparability of assessment methods if there is more than one group              | 6-7          |
| Bias                         | 9       | Describe any efforts to address potential sources of bias                                                                                                                                         | 15           |
| Study size                   | 10      | Explain how the study size was arrived at                                                                                                                                                         | 6            |
| Quantitative variables       | 11      | Explain how quantitative variables were handled in the analyses. If applicable, describe which groupings were chosen and why                                                                      | 6-7          |
| Statistical methods          | 12      | (a) Describe all statistical methods, including those used to control for confounding                                                                                                             | 7            |
|                              |         | (b) Describe any methods used to examine subgroups and interactions                                                                                                                               | 7            |
|                              |         | (c) Explain how missing data were addressed                                                                                                                                                       | 7            |
|                              |         | (d) If applicable, describe analytical methods taking account of sampling strategy                                                                                                                | n.a          |
|                              |         | (e) Describe any sensitivity analyses                                                                                                                                                             | n.a          |
| <b>Results</b>               |         |                                                                                                                                                                                                   |              |
| Participants                 | 13*     | (a) Report numbers of individuals at each stage of study—eg numbers potentially eligible, examined for eligibility, confirmed eligible, included in the study, completing follow-up, and analysed | 8            |
|                              |         | (b) Give reasons for non-participation at each stage                                                                                                                                              | 8            |
|                              |         | (c) Consider use of a flow diagram                                                                                                                                                                | Fig.1        |
| Descriptive data             | 14*     | (a) Give characteristics of study participants (eg demographic, clinical, social) and information on exposures and potential confounders                                                          | 8 & table. 1 |
|                              |         | (b) Indicate number of participants with missing data for each variable of interest                                                                                                               | n.a          |
| Outcome data                 | 15*     | Report numbers of outcome events or summary measures                                                                                                                                              | Table 2-4    |

|    |                          |    |                                                                           |
|----|--------------------------|----|---------------------------------------------------------------------------|
| 1  |                          |    |                                                                           |
| 2  | Main results             | 16 | (a) Give unadjusted estimates and, if applicable, confounder-adjusted     |
| 3  |                          |    | estimates and their precision (eg, 95% confidence interval). Make clear   |
| 4  |                          |    | which confounders were adjusted for and why they were included            |
| 5  |                          |    |                                                                           |
| 6  |                          |    | (b) Report category boundaries when continuous variables were             |
| 7  |                          |    | categorized                                                               |
| 8  |                          |    | (c) If relevant, consider translating estimates of relative risk into     |
| 9  |                          |    | absolute risk for a meaningful time period                                |
| 10 |                          |    |                                                                           |
| 11 | Other analyses           | 17 | Report other analyses done—eg analyses of subgroups and                   |
| 12 |                          |    | interactions, and sensitivity analyses                                    |
| 13 |                          |    |                                                                           |
| 14 | <b>Discussion</b>        |    |                                                                           |
| 15 | Key results              | 18 | Summarise key results with reference to study objectives                  |
| 16 | Limitations              | 19 | Discuss limitations of the study, taking into account sources of          |
| 17 |                          |    | potential bias or imprecision. Discuss both direction and magnitude of    |
| 18 |                          |    | any potential bias                                                        |
| 19 |                          |    |                                                                           |
| 20 | Interpretation           | 20 | Give a cautious overall interpretation of results considering objectives, |
| 21 |                          |    | limitations, multiplicity of analyses, results from similar studies, and  |
| 22 |                          |    | other relevant evidence                                                   |
| 23 |                          |    |                                                                           |
| 24 | Generalisability         | 21 | Discuss the generalisability (external validity) of the study results     |
| 25 |                          |    |                                                                           |
| 26 | <b>Other information</b> |    |                                                                           |
| 27 | Funding                  | 22 | Give the source of funding and the role of the funders for the present    |
| 28 |                          |    | study and, if applicable, for the original study on which the present     |
| 29 |                          |    | article is based                                                          |
| 30 |                          |    |                                                                           |

31 \*Give information separately for exposed and unexposed groups.

32  
33  
34 **Note:** An Explanation and Elaboration article discusses each checklist item and gives methodological background and  
35 published examples of transparent reporting. The STROBE checklist is best used in conjunction with this article (freely  
36 available on the Web sites of PLoS Medicine at <http://www.plosmedicine.org/>, Annals of Internal Medicine at  
37 <http://www.annals.org/>, and Epidemiology at <http://www.epidem.com/>). Information on the STROBE Initiative is  
38 available at [www.strobe-statement.org](http://www.strobe-statement.org).  
39  
40  
41  
42  
43  
44  
45  
46  
47  
48  
49  
50  
51  
52  
53  
54  
55  
56  
57  
58  
59  
60
