# Supplementary material for: Knowledge, attitude and practice of community pharmacy personnel in tuberculosis patient detection: a multicentre cross-sectional study in a high-burden tuberculosis setting
Source: PubMed Central journal article supplement — BMJ Open. 2022 Jul 5;12(7):e060078. doi: 10.1136/bmjopen-2021-060078 (PMC9258488; doi:10.1136/bmjopen-2021-060078), 2022-07-05
Supplement: bmjopen-2021-060078supp001.pdf [file bmjopen-2021-060078supp001.pdf]

**SUPPLEMENTARY FILE**

**Supplementary File 1.** Characteristics of the study participants in the validity and reliability test(n= 200)

| No | The characteristics                              | Number      |
|----|--------------------------------------------------|-------------|
| 1  | Female (number, %)                               | 175 (87.50) |
| 2  | Marital status (number, %)                       |             |
|    | Single                                           | 65 (32.50)  |
|    | Married                                          | 129 (64.50) |
|    | Widow/ widower                                   | 6 (3.0)     |
| 3  | Type of the professional background (number, %)  |             |
|    | Pharmacy technicians                             | 49 (24.50)  |
|    | Pharmacist                                       | 151 (75.50) |
| 4  | Educational level (number, %)                    |             |
|    | Senior high school or equivalent                 | 4 (2)       |
|    | Diploma                                          | 28 (14)     |
|    | Bachelor                                         | 15 (70.50)  |
|    | Pharmacist                                       | 141 (70.50) |
|    | Master                                           | 12 (6)      |
|    | Doctor                                           | 0           |
| 5  | Type of pharmacy (number, %)                     |             |
|    | Chain pharmacy                                   | 35 (17.50)  |
|    | Independent pharmacy                             | 165 (82.50) |
| 6  | The number of practice place (number, %)         |             |
|    | One pharmacy                                     | 173 (86.50) |
|    | Two pharmacies                                   | 20 (10)     |
|    | Three pharmacies                                 | 3 (1.50)    |
|    | More than three pharmacies                       | 4 (2)       |
| 7  | Providing drug consultation services (number, %) | 30 (15)     |
| 8  | Experiencing in TB training (number, %)          |             |
|    | Never                                            | 93 (46.50)  |
|    | More than two years ago                          | 47 (23.50)  |
|    | One- two years ago                               | 33 (16.50)  |
|    | Six months - one year ago                        | 23 (11.50)  |
|    | Less than six months ago                         | 4 (2)       |

**Supplementary File 2.** Item correlation with Pearson test (n= 200)

| Domain    | Items | Coefficient validity (r) | p-value |
|-----------|-------|--------------------------|---------|
| Knowledge | K1    | 0.439                    | 0.00    |
|           | K2    | 0.422                    | 0.00    |
|           | K3    | 0.149                    | 0.04    |
|           | K4    | 0.172                    | 0.02    |
|           | K5    | 0.241                    | 0.00    |
|           | K6    | 0.166                    | 0.02    |
|           | K7    | 0.611                    | 0.00    |
|           | K8    | 0.385                    | 0.00    |
|           | K9    | 0.441                    | 0.00    |
|           | K10   | 0.259                    | 0.00    |
|           | K11   | 0.332                    | 0.00    |
|           | K12   | 0.298                    | 0.00    |
|           | K13   | 0.530                    | 0.00    |
|           | K14   | 0.585                    | 0.00    |
|           | K15   | 0.364                    | 0.00    |
|           | K16   | 0.512                    | 0.00    |
|           | K17   | 0.463                    | 0.00    |
| Attitude  | A1    | 0.715                    | 0.00    |
|           | A2    | 0.793                    | 0.00    |
|           | A3    | 0.661                    | 0.00    |
|           | A4    | 0.720                    | 0.00    |
| Practice  | P1    | 0.845                    | 0.00    |
|           | P2    | 0.884                    | 0.00    |
|           | P3    | 0.795                    | 0.00    |

**Supplementary File 3.** Reliability test of the items (n= 200)

| Domain    | Cronbach's Alpha |
|-----------|------------------|
| Knowledge | 0.63             |
| Attitude  | 0.69             |
| Practice  | 0.79             |

**Information:** \*Reliable if the Cronbach's alpha is more than 0.60

**Supplementary File 4.** The multivariable linear regression analysis for factors associated with knowledge, attitude and practice of TBPD (n=1,125).

| No | Variables                                         | Knowledge* |         |        |       | Attitude** |         |        |       | Practice*** |         |        |       |
|----|---------------------------------------------------|------------|---------|--------|-------|------------|---------|--------|-------|-------------|---------|--------|-------|
|    |                                                   | B          | p-value | 95% CI |       | B          | p-value | 95% CI |       | B           | p-value | 95% CI |       |
|    |                                                   |            |         | Min.   | Max.  |            |         | Min.   | Max.  |             |         | Min.   | Max.  |
| 1  | Male gender <sup>¥§</sup>                         | -0.31      | 0.22    | -0.81  | 0.18  | 0.68       | 0.00    | 0.26   | 1.09  | 0.41        | .039    | 0.02   | 0.80  |
| 2  | Age                                               | 0.07       | 0.00    | 0.03   | 0.10  | 0.01       | 0.47    | -0.02  | 0.04  | -0.02       | .205    | -0.05  | 0.01  |
| 3  | Married status <sup>€</sup>                       | -0.22      | 0.36    | -0.69  | 0.25  | 0.18       | 0.37    | -0.22  | 0.58  | 0.25        | .186    | -0.12  | 0.63  |
| 4  | Pharmacist                                        | 2.15       | 0.00    | 1.68   | 2.63  | 0.12       | 0.56    | -0.29  | 0.54  | -0.17       | .385    | -0.56  | 0.22  |
| 5  | Chain pharmacy <sup>¶</sup>                       | 0.48       | 0.06    | -0.03  | 0.99  | -0.64      | 0.00    | -1.07  | -0.21 | 0.29        | .166    | -0.12  | 0.69  |
| 6  | Working experience                                | -0.01      | 0.66    | -0.05  | 0.03  | -0.03      | 0.10    | -0.07  | 0.01  | 0.02        | .256    | -0.02  | 0.06  |
| 7  | Working hour per week                             | -0.00      | 0.84    | -0.01  | 0.01  | -0.01      | 0.26    | -0.02  | 0.00  | -0.16       | .001    | -0.03  | -0.01 |
| 8  | Providing drug consultation services <sup>#</sup> | -0.16      | 0.59    | -0.73  | 0.42  | 0.91       | 0.00    | 0.43   | 1.40  | 0.68        | .003    | 0.23   | 1.14  |
| 9  | Experiencing TB training                          | 0.65       | 0.00    | 0.25   | 1.04  | 0.84       | 0.00    | 0.51   | 1.16  | 0.83        | .000    | 0.52   | 1.15  |
| 10 | Two practice locations <sup>£</sup>               | -0.60      | 0.19    | -1.33  | 0.13  | 0.16       | 0.61    | -0.46  | 0.78  | 0.30        | .319    | -0.29  | 0.87  |
| 11 | Three or more practice locations <sup>£</sup>     | -0.48      | 0.31    | -1.40  | 0.45  | -0.10      | 0.81    | -0.87  | 0.68  | 0.13        | .738    | -0.61  | 0.86  |
| 12 | County of Bandung' site <sup>‡</sup>              | -1.04      | 0.00    | -1.63  | -0.45 | 0.93       | 0.00    | 0.44   | 1.43  | -0.52       | .031    | -0.99  | -0.05 |
| 13 | City of Makassar' site <sup>‡</sup>               | -1.13      | 0.00    | -1.70  | -0.55 | 0.51       | 0.04    | 0.02   | 0.99  | 0.06        | .785    | -0.40  | 0.52  |
| 14 | City of Medan' site <sup>‡</sup>                  | -0.47      | 0.11    | -1.06  | 0.11  | 0.21       | 0.40    | -0.28  | 0.71  | -0.17       | .482    | -0.63  | 0.30  |
| 15 | TB knowledge                                      | n.a        | n.a     | n.a    | n.a   | 0.07       | 0.00    | 0.02   | 0.12  | 0.02        | .363    | -0.03  | 0.07  |
| 16 | Positive attitude in TB case detection            | 0.10       | 0.00    | 0.03   | 0.17  | n.a        | n.a     | n.a    | n.a   | 0.34        | .000    | 0.29   | 0.40  |
| 17 | Availability of medical doctor practice           | 0.31       | 0.15    | -0.11  | 0.72  | 0.02       | 0.91    | -0.33  | 0.37  | 0.22        | .184    | -0.11  | 0.55  |

**Information:** \*R<sup>2</sup>= 0.18; \*\*R<sup>2</sup>= 0.09; \*\*\*R<sup>2</sup>= 0, 2; B = Beta coefficient; CI: confidence interval; Min: Minimum; Max: maximum; n.a: not applicable; The reference group= <sup>¥</sup>Female, <sup>€</sup>unmarried status, <sup>§</sup>assistant pharmacist, <sup>¶</sup>Singlepharmacy, <sup>#</sup>No drug consultation service, <sup>£</sup>one practice location, <sup>‡</sup>City of Bandung location; red colour: p-value < 0.05

**Supplementary File 5.** The multivariable logistic regression for sub-group analysis of the characteristics male gender among the participants (n= 1,125)

| Variables                                        | p-value | Odds ratio | 95% CI |      |
|--------------------------------------------------|---------|------------|--------|------|
|                                                  |         |            | Min.   | Max. |
| <b>Participant characteristics</b>               |         |            |        |      |
| Married status <sup>€</sup>                      | 0.13    | 0.75       | 0.51   | 1.09 |
| Age*                                             | 0.00    | 1.05       | 1.02   | 1.08 |
| <b>Professional characteristics</b>              |         |            |        |      |
| Pharmacist <sup>\$</sup>                         | 0.34    | 1.21       | 0.82   | 1.79 |
| Chain Pharmacist <sup>¶</sup>                    | 0.11    | 1.39       | 0.93   | 2.08 |
| Working experience                               | 0.91    | 1.00       | 0.97   | 1.03 |
| Providing drug information service <sup>#*</sup> | 0.02    | 1.68       | 1.10   | 2.56 |
| Availability of medical doctor practice          | 0.51    | 1.12       | 0.80   | 1.55 |
| Experience in TB training                        | 0.71    | 0.94       | 0.69   | 1.29 |
| Working hours per week                           | 0.34    | 1.00       | 0.99   | 1.02 |
| Two practice locations <sup>£</sup>              | 0.21    | 1.40       | 0.83   | 2.37 |
| Three practice locations <sup>£</sup>            | 0.76    | 0.89       | 0.42   | 1.88 |
| <b>Study Sites</b>                               |         |            |        |      |
| County of Bandung <sup>‡</sup>                   | 0.10    | 1.47       | 0.93   | 2.33 |
| Makassar <sup>‡</sup>                            | 0.53    | 0.86       | 0.54   | 1.37 |
| Medan <sup>‡</sup>                               | 0.61    | 0.88       | 0.54   | 1.43 |
| <b>Knowledge and Attitude on TBPD</b>            |         |            |        |      |
| Knowledge                                        | 0.24    | 0.97       | 0.93   | 1.02 |
| Attitude*                                        | 0.00    | 1.10       | 1.04   | 1.16 |

**Information:** \* The significant variable (p<0.05); Reference group= = <sup>€</sup>unmarried status, <sup>\$</sup>pharmacy technician, <sup>¶</sup>Single pharmacy, <sup>#</sup>No drug consultation service, <sup>£</sup>one practice location, <sup>‡</sup>City of Bandung location; CI: Confidence Interval; red colour: p-value < 0.05
